1 **Title** A neurocomputational theory of action regulation predicts  
2 motor behavior in neurotypical individuals and patients with  
3 Parkinson's disease

4 S. Zhong<sup>1</sup>, J. Choi<sup>2</sup>, N. Hashoush<sup>3</sup>, D. Babayan<sup>3</sup>, M. Malekmohammadi<sup>3</sup>, N.  
5 Pouratian<sup>2,¶</sup>, V. N. Christopoulos<sup>1,4,¶</sup>

6 <sup>1</sup>Neuroscience graduate program, University of California Riverside, Riverside, CA, USA

7 <sup>2</sup>Department of Neurological Surgery, UT Southwestern Medical Center, Dallas, TX,  
8 USA

9 <sup>3</sup>David Geffen Sch. of Med., University of California Los Angeles, Los Angeles, CA

10 <sup>4</sup>Department of Bioengineering, University of California Riverside, Riverside, CA, USA

11 ¶ These authors jointly supervised this work (Correspondence)

12 \* E-mail: Corresponding [vchristo@engr.ucr.edu](mailto:vchristo@engr.ucr.edu) , [Nader.pouratian@utsouthwestern.edu](mailto:Nader.pouratian@utsouthwestern.edu)

13 **Abstract**

14 Surviving in an uncertain environment requires not only the ability to select the best  
15 action, but also the flexibility to withhold inappropriate actions when the environmen-  
16 tal conditions change. Although selecting and withholding actions have been extensively  
17 studied in both human and animals, there is still lack of consensus on the mechanism un-  
18 derlying these action regulation functions, and more importantly, how they inter-relate.  
19 A critical gap impeding progress is the lack of a computational theory that will integrate  
20 the mechanisms of action regulation into a unified framework. The current study aims to  
21 advance our understanding by developing a neurodynamical computational theory that  
22 models the mechanism of action regulation that involves suppressing responses, and pre-  
23 dicts how disruption of this mechanism can lead to motor deficits in Parkinson's disease

24 (PD) patients. We tested the model predictions in neurotypical individuals and PD pa-  
25 tients in three behavioral tasks that involve free action selection between two opposed  
26 directions, action selection in the presence of conflicting information and abandoning an  
27 ongoing action when a stop signal is presented. Our results and theory suggest an inte-  
28 grated mechanism of action regulation that affects both action initiation and inhibition.  
29 When this mechanism is disrupted, motor behavior is affected, leading to longer reaction  
30 times and higher error rates in action inhibition.

## 31 **Author Summary**

32 Humans can rapidly regulate actions according to updated demands of the environment.  
33 A key component of action regulation is action inhibition, the failure of which contributes  
34 to various neuropsychiatric disorders. When faced with multiple choices, dealing with  
35 conflicting information, or current actions become inappropriate or unwanted, we should  
36 be able to pause or completely abandon actions. Despite extensive efforts to understand  
37 how the brain selects, pauses, and abandons actions based on environmental demands, the  
38 mechanisms underlying these action regulation functions and, perhaps more importantly,  
39 how they inter-relate remain elusive. Part of this challenge lies in the fact that these  
40 mechanisms were rarely explored together, making it difficult to develop a unified theory  
41 that explains the computational aspects of action regulation functions. The current study  
42 introduces a large-scale model that better characterizes the computations of action reg-  
43 ulation functions, how they are implemented within brain networks that involve frontal,  
44 motor and basal ganglia (BG) circuits, and how disruption of these circuits can lead to  
45 deficits in motor behavior seen in Parkinson's disease (PD). The model was developed by  
46 studying the motor behavior of healthy individuals and PD patients in three motor tasks

47 that involve action inhibition. Overall, the model explains many key aspects on how  
48 the brain regulates actions that involve inhibitory processes, opening new avenues for  
49 improving and developing therapeutic interventions for diseases that may involve these  
50 circuits.

## 51 **1 Introduction**

52 Surviving in an uncertain environment requires not only the ability to accurately and  
53 rapidly select the best action, but also the flexibility to abandon obsolete actions when  
54 they are rendered unwanted or inappropriate. How actions are initiated and regulated  
55 is a fundamental neurobiological question that is of high impact for understanding how  
56 the human brain functions. A key component of action regulation is inhibiting actions,  
57 which when abnormal contributes to neuropsychiatric diseases, such as Parkinson's disease  
58 (PD), obsessive-compulsive disorder (OCD), and others [1–5]. Action inhibition occurs in  
59 at least 3 ways: (a) action selection – selecting one action requires suppressing alternative  
60 motor plans, (b) decision conflict – choosing in the presence of conflicting information  
61 requires suppressing alternative actions to buy more time to make a correct decision and  
62 (c) outright stopping – inhibiting a response when it is rendered inappropriate.

63 Over the past years, a number of studies attempted to characterize the mechanism of  
64 action regulation that involves action inhibition under different experimental paradigms.  
65 A recent cognitive theory suggests that action selection occurs through a competitive  
66 process between movement plans [6–10]. According to this theory, in situations affording  
67 more than one alternatives, animals prepare multiple actions in parallel that compete for  
68 selection through mutual inhibitory interactions before choosing to execute one. This  
69 affordance competition theory received empirical support from neurophysiological inves-

70 tigtations in the sensorimotor areas of non-human primates (NHPs) showing that the  
71 brain encodes parallel reach, grasp and saccade plans before the animals select between  
72 them [11–13]. It is consistent with the continuous flow model of perception, which sug-  
73 gests that response preparation can begin even before the goal is fully identified and a  
74 decision is made [14–16]. In addition, psychophysical support for this theory comes from  
75 the “go-before-you-know” experiments, in which individuals had to initiate reaching or  
76 saccade movements towards multiple potential targets, without knowing the actual lo-  
77 cation of the goal [17–19]. The individuals compensate for the goal location uncertainty  
78 by aiming towards an intermediate location, a strategy consistent with an averaging of  
79 multiple competing action plans.

80 Recent studies have also explored the mechanisms underlying pausing or abandon-  
81 ing actions using functional MRI [20, 21], local field potential (LFP) recordings [22, 23],  
82 electroencephalography (EEG) recordings [24, 25], as well as single-unit recordings in hu-  
83 mans [26, 27], non-human primates (NHPs) [28, 29] and rodents [30]. The basal ganglia  
84 (BG), and in particular the subthalamic nucleus (STN), has been functionally implicated  
85 in action regulation functions, but in association with distinct frontal areas, such as the  
86 primary motor cortex (M1), the premotor cortex (preMC), the pre-supplementary motor  
87 area (preSMA) and the right inferior frontal gyrus (rIFG) [31–34]. In a sense, STN is acti-  
88 vated when a stop signal is detected, as well as when conflicting information is presented,  
89 to rapidly suppress ongoing or planned actions [35–37].

90 Despite the significant contribution of these studies on understanding how the brain  
91 selects between competing options, deals with conflicting information, and stops planned  
92 or ongoing actions during decisions, the mechanisms of these action regulation functions  
93 and their inter-relations remain elusive. Part of this challenge lies in the fact that previ-  
94 ous studies rarely explore these functions together, making it difficult to develop a unified

95 and integrated theory of action regulation. The current study aims to advance our un-  
96 derstanding on the mechanism underlying action regulation and how disruption of this  
97 mechanism can lead to deficits in motor behavior exhibited in Parkinson's disease (PD).  
98 To address these questions, we trained neurotypical individuals and PD patients to per-  
99 form three motor tasks that involve motor decision between two opposed directions, action  
100 selection in the presence of conflicting information and suppression of unwanted motor re-  
101 sponses when a stop signal is presented. To elucidate the action regulation mechanism in  
102 control and disease state, we modeled the tasks within a neurodynamical computational  
103 framework that combines dynamic field theory with stochastic optimal control theory,  
104 and simulates the processes underlying selection, planning, initiation and suppression of  
105 actions [38,39].

106 Our study presents the first unified theory on action regulation that involves response  
107 inhibition, providing important predictions on how the disruption of major nodes, such  
108 as STN, can deteriorate motor performance leading to longer reaction times in motor  
109 decisions and higher error rates when stopping ongoing actions. Additionally, the neu-  
110 rodynamical theory provides a potential explanation on why PD patients exhibit longer  
111 reaction times than neurotypical individuals even in the lack of competing alternatives  
112 or conflicting information in motor decisions. Overall, our findings shed light on how  
113 the brain regulates actions that involve inhibitory processes, opening new avenues for  
114 improving and developing therapeutic interventions for diseases that may involve these  
115 circuits.

## 116 **2 Results**

### 117 **2.1 Experimental paradigms**

118 Participants were instructed to perform reaching movements using a 2-dimensional joy-  
119 stick under three experimental paradigms: i) decision-making task (action selection), ii)  
120 Eriksen flanker task (decision conflict) and iii) stop-signal task (outright stopping) (Fig.1).  
121 In the decision-making task, participants had to respond to arrow stimuli presented on a  
122 computer screen by freely moving the joystick towards the left or right direction. Choice  
123 trials were interleaved with instructed trials in which all arrows pointed to the same di-  
124 rection. In the Eriksen flanker task, flanking arrows were presented on the screen, all  
125 pointing to the same direction. A target arrow was then presented to indicate the di-  
126 rection to move, either in the same (no conflict, congruent trials) or opposite (conflict,  
127 incongruent trials) direction as the flanking arrows. Finally, in the stop-signal task, the  
128 participants were instructed to reach towards the direction of the arrows. In a minority  
129 of trials, the color of the arrows turned red after a short delay, and the action had to be  
130 abandoned immediately.

131

132

---

Figure 1 somewhere here

133

### 134 **2.2 Motor behavior of neurotypical individuals and PD patients** 135 **in action regulation tasks**

136 We computed the reaction time (RT) for initiating an action as the time interval between  
137 the presentation of the target arrows on the screen and the initiation of the reaching

138 movement. We found that in the decision-making task, choice trials had longer RT than  
139 instructed trials in both populations (Fig. 2A) ( $p < 0.001$ , two-way ANOVA). Interest-  
140 ingly, although the neurotypical participants responded faster than the PD patients in  
141 the instructed trials ( $p < 0.001$ , two-way ANOVA), we found no significant difference in  
142 RT between the two groups in the choice trials ( $p = 0.878$ , two-way ANOVA), (Fig.2A). In  
143 the Eriksen flanker task, both groups exhibited shorter RT in the congruent trials than  
144 in the incongruent trials (Fig. 2B) ( $p < 0.001$  for both neurotypical participants and PD  
145 patients, two-way ANOVA). However, PD patients had slower responses than neurotypical  
146 participants in both congruent and incongruent trials ( $p < 0.01$  for congruent trials,  $p < 0.05$   
147 for incongruent trials, two-way ANOVA). Regarding the stop-signal task, interestingly,  
148 we found that neurotypical participants had slower responses than PD patients in the go  
149 trials (Fig.2C) ( $p < 0.001$ , two sample t-test). In particular, the neurotypical group seems  
150 to have strategically slowed down their responses in the go trials by 233 ms on average  
151 in order to be more successful in inhibiting their response in stop trials ( $p < 0.001$ , two  
152 sample t-test on RT between instructed trials and go trials for the neurotypical popu-  
153 lation). On the other hand, PD patients exhibited much subtler modification of their  
154 response between instructed trials (decision-making task) and go trials (stop-signal task)  
155 - the reaction time for go trials increased only by 47 ms on average compared to instructed  
156 trials ( $p < 0.001$ , two sample t-test), suggesting that the anticipation of the stop signal had  
157 smaller effect on their motor planning behavior.

158

---

Figure 2 somewhere here

159

---

160

161 These findings predict that PD patients will perform worse in stop trials than neu-  
162 rotypical participants, since a lower probability of stopping has often been associated with

163 faster responses in go trials [40–42]. To test this hypothesis, we computed the probability  
164 to stop an action for different stop-signal delay (SSD) values across all participants in  
165 each group. The results showed that the probability to successfully stop an action was  
166 inversely correlated with SSD, and consistent with the hypothesis, PD patients exhibited  
167 lower probability of stopping an action compared to neurotypical individuals (Fig.3).

168

169

---

Figure 3 somewhere here

---

170

### 171 **2.3 An integrated neurodynamical theory of action regulation** 172 **predicts motor behavior**

173 Our findings require a computational theory that could explain the mechanism of action  
174 regulation that involves inhibition and predicts how disruption of this mechanism can  
175 lead to motor impairments in PD patients. Building on our previous successful work in  
176 modeling visuomotor tasks [38, 39], we developed a neurodynamical theory to unify the  
177 action regulation mechanism that involves inhibition. The theory builds on the affordance  
178 competition hypothesis, according to which multiple actions are formed concurrently and  
179 compete over time until one has sufficient evidence to win the competition [6, 7, 12].  
180 It combines dynamic neural field (DNF) theory [43, 44] with stochastic optimal control  
181 theory [45, 46] and its architectural organization is illustrated in Fig.4. Each DNF field  
182 simulates the dynamic evolution of firing rate activity of a network of neurons over a  
183 continuous space with local excitation and surround inhibition. It consists of 181 neurons  
184 - with exception of the context signal field and the pause field - and each of them has  
185 a preferred direction between  $0^\circ$  and  $180^\circ$ . The “spatial sensory input” field encodes



186 the angular representation of the competing actions (i.e., left vs. right movements in  
187 our study). The “expected outcome” field encodes the expected reward for reaching  
188 to a particular direction. The outputs of these two fields send excitatory projections  
189 (green arrows) to the “reach planning” field in a topological manner. The “reach cost”  
190 field encodes the effort cost required to implement an action at a given time and state.  
191 The reach cost field sends inhibitory projections (red arrow) to the reach planning field  
192 to penalize high-effort actions. For instance, an action that requires changing of moving  
193 direction is more “costly” than an action of keeping going in the same direction. Although  
194 the cost field does not have a critical role in this study, since all planning actions are  
195 associated with about same effort, it is required for generating reaching movements from  
196 the optimal control part of the model.

197 We also added to the model architecture a Basal Ganglia (BG)-type mechanism for  
198 implementing the inhibitory process. This mechanism consists of three DNF platforms:  
199 (a) two context signal fields (stop and conflict) that represent information related to  
200 the contextual requirement of the tasks; (b) a pause field that suppresses the activity of  
201 the reach planning field to inhibit planned or ongoing actions. Each of the context fields  
202 consist of 100 neurons which project to the corresponding sub-population of the pause field  
203 via one-to-all excitatory connections. The stop signal field and the conflict signal field are  
204 activated when they detect a stop cue and conflict cue, respectively. Regarding the action  
205 selection function, the model does not need a context field to signal the decision task,  
206 since it can collect this information from the spatial sensory input field. In particular, the  
207 spatial sensory input field projects to the corresponding sub-population on the pause field  
208 with one-to-all excitatory connections. If more than one targets is encoded in the spatial  
209 sensory input field, the corresponding population on the pause field is triggered. Notably,  
210 this architecture is consistent with experimental studies which suggest dissociable frontal-

211 BG circuits for different action suppression functions [34]. The pause field consists of 3  
212 sub-populations of 75 neurons, each of them associated with one of the action regulation  
213 functions (i.e., action decisions between multiple options, action selection in the presence  
214 of conflicting information and outright stopping of actions). Once the pause field is  
215 triggered, the activity of the reach planning field is suppressed to delay a decision when  
216 more time is needed (i.e. during action selection or decision with conflicting information),  
217 or to completely suppress an action when it is no longer wanted or rendered inappropriate  
218 (i.e., outright stopping).

219 Each neuron in the reach planning field is connected with a stochastic optimal con-  
220 troller. Once the activity of a reach neuron  $j$  exceeds the action initiation threshold (cyan  
221 discontinuous line in Fig.4) at the current time and state  $\mathbf{x}_t$ , the corresponding controller  
222 initiates an optimal policy  $\pi_j(\mathbf{x}_t)$  to move the joystick towards the preferred direction of  
223 that neuron (see materials and methods section for more details). Reaching movements  
224 are generated as a mixture of active policies (i.e., policies in which the associated neuronal  
225 activity in the reach planning field is above the action initiation threshold) weighted by  
226 the normalized activity of the corresponding reaching neurons. The normalized activity  
227 is called relative desirability since it reflects the *attractiveness* of a policy with respect to  
228 alternatives (for more details see [19, 38].

229

230

---

Figure 4 somewhere here

---

231

### 232 **2.3.1 Modeling the computations of motor decision-making**

233 The first task to model is the motor decision-making task that involves reaching to either  
234 a single direction (instructed trial) or selecting between two opposite directions (choice

235 trial). Fig.5A illustrates the activity of the reach planning field as a function of time for  
236 a representative instructed (top panel) and choice (bottom panel) trial. Initially, the field  
237 activity is in the resting state. After the target onset in the choice trial, two neuronal  
238 populations selective for the targets are formed and compete through mutual inhibitory  
239 interactions. The activity of the pause field also increased to further inhibit the reach  
240 planning field to delay the initiation of the action (Fig. 6A blue trace shows the mean  
241 activity of the pause field across time in a choice trial). Once the activity of a neuronal  
242 population exceeds an action initiation threshold, the corresponding target is selected,  
243 the activity of the non-selected target is inhibited by the “winning” population, and a  
244 reaching movement is initiated. When only one target is presented (Fig.5A top panel), the  
245 activity of the corresponding neuronal population exceeds the action initiation threshold  
246 faster due to the lack of inhibitory competition from an alternative option and the non-  
247 activation of the pause field (Fig. 6A cyan trace shows that pause field activity remains  
248 on baseline). To get better insight on the model computations, consider two neurons in  
249 the choice trial, one from each population, centered at the target locations (Fig.5D). The  
250 neuron that exceeds the action initiation threshold first (red continuous traces) dictates  
251 the reaction time and the selected target (i.e., the selected direction of movement). In  
252 the absence of action competition (instructed trial), the activity of the reach neuron (blue  
253 trace) exceeds the action initiation threshold faster than when two actions compete for  
254 selection (red traces). Hence, we predict that simulated instructed reaches have shorter  
255 RT than reaches in the choice trials. To test this prediction, we simulated 100 decision-  
256 making trials in which 50 % of them involves choices between two competing options and  
257 the rest of them were instructed trials. Consistent with the prediction, we found that free  
258 choice movements have longer RT than instructed movements, as is shown in Fig.7A.

260

Figure 5 somewhere here

261

262

263

Figure 6 somewhere here

264

### 265 **2.3.2 Modeling the computations of conflicting information in motor deci-** 266 **sions**

267 In the Eriksen flanker task, a “flanker” (i.e., distractor) appears 100 ms before the target.  
268 Once the flanker is presented and detected by the spatial sensory input field, a reach  
269 neuronal population tuned to the flanker direction is formed - i.e., the model prepares  
270 an action towards the direction of the flanker. If the upcoming target coincides with  
271 the flanker direction (congruent trial), the pause field will not be activated (Fig.6B cyan  
272 trace) and the activity of the reach neuronal population will be further increased, leading  
273 to fast reaching movements towards the target direction (Fig.5B top panel). On the  
274 other hand, if the target points to the opposite direction from the flanker (incongruent  
275 trial), a new reach neuronal population is formed and competes with the reach neuronal  
276 population of the flanker (Fig.5B bottom panel). The conflict signal field detects the  
277 “conflicting information” and activates the pause field (Fig.6B blue trace) to suppress  
278 the reach planning field so that the target population will have time to further increase  
279 its activity and win the competition. The expected outcome field, which encodes the  
280 correct movement direction, biases the competition towards the target direction. To better  
281 understand the mechanism of action regulation in the Eriksen flanker task, we consider two  
282 neurons centered at the location of the target and the distractor, respectively (Fig.5E). The

283 neuronal activity of the distractor (red discontinuous trace) increases before the neuronal  
284 activity of the target (red continuous trace), since distractor precedes target presentation.  
285 Once the target is cued, the two neurons compete through inhibitory interactions. This  
286 competition, as well as the inhibition of the reaching neuronal population from the pause  
287 field, delay the action initiation, leading to longer RT. On the other hand, the lack of action  
288 competition and the non-activation of the pause field in the congruent trials (Fig.6B cyan  
289 trace) lead to shorter RT. To test this prediction, we simulated 100 Eriksen flanker task  
290 trials with 50 % of them to be incongruent trials. Consistent with the prediction, we  
291 found that reaching movements in incongruent trials have longer RT than in congruent  
292 trials as illustrated in Fig. 7B.

### 293 **2.3.3 Modeling the computations of outright stopping of actions**

294 Regarding the stop-signal task, the model needs to generate actions while anticipating a  
295 stop signal. The experimental results showed that when people anticipate a stop signal,  
296 they have longer RT as compared to when they do not anticipate a stop signal (i.e.,  
297 instructed trials). This suggests that the pause field is active even in the go trials to  
298 increase the chances of being able to abandon an action in case stopping is required. The  
299 reach planning field activity in the go task resembles that of an instructed trial in the  
300 decision-making task (Fig.5C top panel), the only difference being that in the go trials  
301 the pause field is continuously active (Fig.6C blue trace). Hence, the activity of the  
302 reach planning field increases slower compared to the instructed trial, resulting in longer  
303 RT. In a go trial, the reach neuronal population tuned to the target direction is formed  
304 preparing an action. Once the activity of the population exceeds an action initiation  
305 threshold, the action is performed. However, in some trials, a stop signal is cued and the  
306 pause field activity is further increased, which subsequently inhibits the activity of the

307 reach planning field to completely stop the planned or the ongoing action (Fig.5C bottom  
308 panel). To better understand the mechanism for stopping actions, consider one neuron  
309 from the population centered at the location of the target. The activity of the neuron  
310 increases once the target is cued and an action is initiated when the activity exceeds the  
311 action initiation threshold (Fig.5F blue trace). However, if a stop signal is cued, the pause  
312 field inhibits the activity of the neuron to stop the ongoing action (Fig.5F black trace).  
313 The stop signal is given with some delay (stop signal delay, SSD) in each trial. The longer  
314 the SSD is, the harder it is for the pause field to suppress the activity of the reach neuron  
315 increasing the chance to fail to stop the action. To test the model prediction, we simulated  
316 50 go trials, as well as 250 stop trials, in which a stop stimulus appeared at different SSDs,  
317 signaling the model to abandon the action. Consistent with the model predictions, we  
318 found that go trials have longer RTs than instructed trials ( $p < 0.001$ , two-way ANOVA,  
319 comparison made between the mean RT on instructed trials in the decision-making task  
320 and mean RT on go trials in the stop-signal task), and the probability to successfully stop  
321 a response reduces with increased SSD - i.e., the longer the signal delay, the harder it is  
322 for the model to stop an action (Fig.8 blue trace).

## 323 **2.4 Dysfunction of the pause mechanism predicts motor impair-** 324 **ment in PD patients**

325 So far the neurodynamical theory is capable of capturing the motor behavior of the  
326 neurotypical participants in the 3 action regulation tasks. However, one of the main  
327 findings in our study is that PD patients exhibit overall slower responses in nearly all  
328 tasks compared to neurotypical participants. This motor impairment can be explained  
329 within the neurodynamical theory as a deficit on the pause mechanism. That is, the

330 pause field is active even in the absence of conflicting information (congruent trials in  
331 the Eriksen flanker task) or competition between multiple actions (instructed trials in  
332 the decision-making task). To get a better understanding on how dysfunction of the  
333 pause mechanism affects motor behavior, Fig.6 shows the activity of the pause field as a  
334 function of time for a single trial across all tasks when simulating actions to model the  
335 RT of neurotypical participants and PD patients. In the decision-making task, the pause  
336 field is activated even when no action competition is presented (i.e., instructed trials)  
337 to capture the RT of the PD patient (Fig.6A magenta trace). This explains the slower  
338 response on initiating an action on instructed trials from PD patients. Also, the lack  
339 of difference on RT between neurotypical and PD patients in free choice trials suggests  
340 that the pause field exhibits similar activation levels when deciding between competing  
341 options after targets onset in both groups (Fig.6A). Regarding the flanker task, the pause  
342 field is active before the target onset in PD patients, explaining the slower response in  
343 both congruent and incongruent trials compared to neurotypical individuals (Fig.6B red  
344 and magenta traces). We need to point out here that although the pause field exhibits  
345 the same activation level in instructed and free choice trials (decision-making task) in PD  
346 patients, the slower response in choice trials compared to instructed trials is due to the  
347 inhibitory action competition between the two alternative movement directions.

348 Additionally, another important finding in our study is that PD patients have shorter  
349 RT in go trials than neurotypical participants in the stop signal task. By comparing  
350 the RT of movements between go trials in the stop-signal task and instructed trials in  
351 the decision-making task, we found that neurotypical participants delayed their responses  
352 in the go trials because they anticipated a stop signal as compared to when they did  
353 not anticipate a stop signal (i.e., instructed trials). This *response delay effect* (RDE)  
354 has been reported in previous studies [47–50] and has been associated with an “active

355 braking mechanism” that increases the chance of abandoning a response in case stopping  
356 is required [51]. Note that PD patients also exhibited this active braking mechanism, but  
357 the difference in RT between go trials with anticipation of stopping signal and instructed  
358 trials was much smaller compared to neurotypical participants. Overall, these findings  
359 suggest that the pause field is active in the go trials for predicting the motor behavior  
360 in both groups of participants. In fact, the pause field activity is higher in neurotypical  
361 participants than PD patients, before a stop signal is detected, to explain the slower  
362 response of the first group compared to the latter group (Fig.6C, blue and red traces). We  
363 simulated 50 go trials with elevated pause field activity for both neurotypical participants  
364 and PD patients. Consistent with the behavioral findings, the go trials have longer RT  
365 in the simulated neurotypical participants than PD patients (Fig. 7C) ( $p < 0.001$ , two  
366 sample t-test). Additionally, the model predicts that the probability to successfully stop  
367 a response is lower in PD patients than in neurotypical individuals (Fig. 8) due to the  
368 faster response of PD patients.

369

370

---

Figure 7 somewhere here

371

372

373

---

Figure 8 somewhere here

374

---



## 375 **3 Discussion**

### 376 **3.1 General**

377 Survival of species in an ever-changing environment requires flexibility in action selec-  
378 tion. Traditional theories suggest that action selection takes place before action prepa-  
379 ration [52–55]. However, recent cognitive theories challenge this view suggesting that in  
380 situations affording more than one alternative options, individuals prepare multiple ac-  
381 tions in parallel that compete for selection before choosing one to execute [6–10]. This  
382 theory received empirical support from neurophysiological investigations in the sensorimo-  
383 tor areas of non-human primates (NHPs) showing that the brain encodes parallel reach,  
384 grasp and saccade plans before the animals select between them [11,12,56]. It is consistent  
385 with the continuous flow model of perception, which suggests that response preparation  
386 can begin even before the goal is fully identified and a decision is made [14–16]. Psy-  
387 chophysical support for this theory comes from the observation that when reaching to  
388 multiple potential targets, the initial movement is directed towards the average location  
389 of the targets, consistent with the theory that multiple prepared reaches being executed  
390 simultaneously [17–19].

391 Flexibility in action selection includes not only being fast and accurate enough when  
392 selecting between competing options, but also being flexible enough to change actions  
393 according to updated demands of the environment. This includes delaying actions in the  
394 presence of conflicting information and completely abandoning obsolete actions when they  
395 are rendered inappropriate [57–60]. Series of studies have explored how different brain  
396 regions contribute to programming, re-programming and stopping of actions using neural  
397 recordings and functional neuroimaging techniques [20,21,24,25,28,29,61,62]. The basal  
398 ganglia (BG), and in particular, the subthalamic nucleus (STN), has been functionally

399 implicated in action regulation, but in association with distinct frontal areas, such as the  
400 primary motor cortex (M1), the premotor cortex (preMC), the presupplementary motor  
401 area (preSMA) and the right inferior frontal gyrus (rIFG) [31–34]. In a sense STN seems  
402 to act as a “brake” when a stop signal is presented to rapidly suppress ongoing actions.  
403 Furthermore, various computational theories including the drift-diffusion model (DDM),  
404 urgency-gating model (UGM), evidence accumulation models (EAMs), race models and  
405 mutual inhibition models, have been constructed to explain how the brain selects between  
406 competing options, inhibits actions in the presence of conflicting information and aban-  
407 dons planned or ongoing action when they are rendered inappropriate [63–66]. Although  
408 these theories provide significant insights into the action regulation mechanisms, a major  
409 limitation is that they explored separately each of these three motor functions, making it  
410 challenging to develop a unified theory of action regulation. A computational theory that  
411 can simulate the mechanisms underlying selecting, inhibiting and outright stopping of  
412 actions is needed to unify and integrate these distinctly studied actions and mechanisms.

413 Our research focuses exactly on what has been missing from previous studies – to  
414 design a large scale computational theory that can predict: 1) how the brain selects  
415 between competing actions, delays actions in the presence of conflicting information and  
416 stops actions when they are rendered inappropriate, 2) how neuropsychiatric diseases,  
417 such as PD, affect the action regulation circuitry and lead to motor deficits. Building  
418 on our previous work [38,39], we developed a neurodynamical framework to integrate the  
419 three action regulation functions into a unified computational theory. This computational  
420 theory is based on the affordance competition hypothesis, in which multiple actions are  
421 formed concurrently and compete over time until one has sufficient evidence to win the  
422 competition [6]. We replace evidence accumulation with desirability – a continuously  
423 evolving quantity that integrates all sources of information about the relative value of an

424 action with respect to alternatives. The winning action determines the reaction time and  
425 the direction of movement. The computational theory includes a BG-type mechanism  
426 of inhibiting actions in the presence of competing options, conflicting information and  
427 stopping signals. We tested the computational model in a series of tasks that involve  
428 action selection, decision conflict and outright stopping using neurotypical individuals  
429 and PD patients. Our findings showed that the model captures many aspects on human  
430 behavior, such as the longer RT in the presence of competing actions and conflicting  
431 information, as well as the inverse relationship between the probability to successfully  
432 stop an action and stop signal delay (SSD). It also predicts the motor impairment on PD  
433 patients when performing these three motor tasks as a deficit in the pause mechanism.  
434 In particular, the model explains the longer responses in generating actions even without  
435 the presence of competing action and conflicting information in PD patients compared  
436 to neurotypical participants as a consequence of hyperactivity on the pause field. This is  
437 consistent with experimental evidence showing that STN is overacting in PD patients [67]  
438 leading to longer responses in visuomotor tasks. Overall, to the best of our knowledge,  
439 our study presents the first neuro-computational theory that integrates the mechanisms  
440 of three action regulation functions and predicts how disruption of these mechanisms can  
441 lead to motor deficits reported in neurological diseases such as PD.

## 442 **3.2 Mapping to neurophysiology**

443 The computational theory presented in the current study is a systems-level framework  
444 aimed to qualitatively predict response patterns of neuronal activities in ensembles of  
445 neurons, as well as motor behavior, in action regulation tasks. It captures many key  
446 features of the functional properties of the cortical-subcortical network involved in action  
447 regulation. The spatial sensory input field mimics the organization level of the posterior

448 parietal cortex (PPC) [68, 69]. The expected reward field can be associated with the  
449 ventromedial prefrontal cortex (vmPFC) and orbitofrontal cortex (OFC), two frontal areas  
450 with important role in computation and integration of reward [70, 71]. The reach cost field  
451 can be equated to the anterior cingulate cortex (ACC) that has a key role in computing  
452 the cost for performing an action [72, 73]. The reach planning field can be associated with  
453 the parietal reach region (PRR) [74, 75] and the premotor dorsal cortex (PMd) [76, 77],  
454 two cortical areas involved in planning of reaching movements. The stop signal field can  
455 be equated with the right inferior frontal gyrus (rIFG), which is recruited when cues  
456 associated with response inhibition are detected [78, 79]. Regarding the conflict signal  
457 field, the popular view is that the pre-supplementary motor area (preSMA) detects the  
458 co-activation of different but conflicted responses (e.g., naming the color of the word *red*  
459 written with green color), it activates the STN to *temporarily* suppress a response [80, 81].  
460 Finally the pause field can be equated to the STN which is activated in tasks that require  
461 stopping or pausing behavioral outputs to suppress actions [23, 27, 30, 35].

### 462 **3.3 Computational modeling of action inhibition deficits in PD** 463 **patients**

464 PD is a progressive neurodegenerative disease associated with progressive loss of dopamin-  
465 ergic neurons in the substantia nigra of the BG [67]. The disruption of frontal-BG circuitry  
466 is responsible for the development of major symptoms of PD, including rigidity, tremor,  
467 bradykinesia, and postural instability [82, 83]. In particular, impairment of response in-  
468 hibition abilities, which greatly affects the life quality of PD patients, is considered to  
469 be a sensitive measure to the progression of PD [84]. As a key player in the frontal-BG  
470 circuit, the STN is suggested to mediate a “pause” function by rapidly inhibiting the BG

471 activity. Therefore, it is considered to play a prominent role in the pathology of PD [85].  
472 An increase in the neuronal activity of the STN has been demonstrated in electrophysi-  
473 ological and behavioral studies in non-human primate models of PD [86] as well as PD  
474 patients [87]. Our findings suggest that an increase in the STN-mediated “pause” signal is  
475 responsible for the impairment of action inhibition abilities in PD patients. In our model,  
476 we assigned higher baseline activation level of the pause field in the decision-making task  
477 and Eriksen flanker task in PD patients compared with neurotypical participants. Consis-  
478 tent with the model predictions, PD patients exhibited longer RT than healthy individuals  
479 in the instructed trials of the decision making task, as well as in both incongruent trials  
480 and congruent trials of the Eriksen flanker task. Notably, RT in the free choice trials  
481 of the decision-making task wasn’t significantly different between PD patients and neu-  
482 rotypical participants. This suggests that pause field, which is already highly active in  
483 instructed trials, is not further activated in the choice trials.

484 An interesting finding in our study was that neurotypical individuals had slower re-  
485 sponse than PD patients to initiate an action in the stop-signal task. This is somewhat  
486 counter-intuitive since the STN is overactive in PD patients and therefore we would expect  
487 that they would had slower response than neurotypical participants. However, when we  
488 compared RT between instructed trials (decision-making task) and go trials (stop signal  
489 task) of the neurotypical individuals, we found that they responded slower when they  
490 anticipated a stop signal. On the other hand, we found much subtler difference in RT  
491 between instructed trials and go trials in PD patients. This suggests that the pause mech-  
492 anism is activated in the stop-signal task in neurotypical individuals even before a stop  
493 signal is presented. By activating the pause field to simulate the motor behavior of the  
494 neurotypical participants, the model predicts that PD patients will have faster responses  
495 and lower probability to stop planned or ongoing actions compared to neurotypical par-

496 ticipants. In other words, the model explains the slower responses of the neurotypical  
497 participants as a cognitive strategy adapted to minimize the probability to fail to stop an  
498 action if a stop signal is detected.

### 499 **3.4 Activity suppression or increase of action initiation thresh-** 500 **old?**

501 In our theory, the pause field delays motor decisions by suppressing the activity of the  
502 reach planning field. However, an alternative hypothesis is that the pause field mediates  
503 the action inhibition function by increasing the action initiation threshold. Previous  
504 studies suggest that STN low-frequency oscillatory activity and medial prefrontal cortex  
505 (mPFC)-STN coupling are involved in determining the amount of evidence (i.e., action  
506 initiation threshold) needed before making a decision [88–91]. Additionally, clinical studies  
507 showed that deep brain stimulation targeting the STN in PD patients can modulate the  
508 amount of evidence, and therefore the action initiation threshold, required to initiate an  
509 action [89]. Hence, it is also likely that the STN delays motor decisions in the presence  
510 of competing actions and/or conflicting information by increasing the action initiation  
511 threshold, instead of suppressing the activity of the motor areas that generate actions.  
512 Our computational theory is capable of modeling this hypothesis by adjusting the action  
513 initiation threshold in the reach planning field. However, it cannot dissociate between  
514 the two hypotheses on how the STN pauses actions when needed. To do so, future  
515 neurophysiological or neuroimaging studies need to record activity from the STN and  
516 motor areas during decision tasks with multiple options and/or conflicting information.

### 517 **3.5 Hyperactive pause mechanism or altered cost/reward ratio** 518 **in PD patients?**

519 Although our study suggests that deficits in movement preparation in PD patients, such  
520 as slow reaction times, are related to hyperactivity in STN that inhibits planned actions,  
521 other studies have associated motor impairments with motivational deficits [92]. In partic-  
522 ular, motivational deficits seem to significantly contribute to bradykinesia in PD patients  
523 and lead to alternation in the amount of effort required to perform a movement at normal  
524 speed, as well as the perceived reward for successfully completing the action [93].

525 Motor decisions are frequently made based on expected reward and the associated  
526 effort cost required to obtain the reward. The cost has been considered to be detrimental,  
527 since we tend to choose the less costly actions especially when they are associated with  
528 similar expected rewards [94,95]. The dopaminergic neurons seem to be critically involved  
529 in the process of cost versus reward (i.e., cost/reward ratio) evaluation. Dopamine deple-  
530 tion from rat results in decreased tolerance for effort cost, whereas enhanced dopamine  
531 levels has the opposite effect [94,96]. Loss of dopaminergic neurons and their projec-  
532 tions is a major pathological hallmark in PD patients. Clinical studies have shown that  
533 PD patients, regardless of medication status, tend to engage less effort for the lowest  
534 reward compared with neurotypical participants in a hand-squeezing task [93]. However,  
535 dopamine medication motivates PD patients to engage more effort for a given reward,  
536 comparing to their off medication state. In addition, Deep brain stimulation (DBS) of  
537 the STN establishes a reliable congruency between action and reward in PD patients and  
538 remarkably enhances it over the level observed in neurotypical individuals [97].

539 Overall, these studies provide evidence that impairment of movement preparation in  
540 PD patients can also be related to deficits in the mechanism that evaluates reward and

541 effort cost associated with actions - i.e., alternation of the cost/reward ratio. Notably,  
542 this can be also modeled within our neurodynamical framework by increasing the amount  
543 of effort required to perform actions towards the cued directions. Additionally, the alter-  
544 nation of the cost/reward ratio in PD patients could be also related to the hyperactivity of  
545 the STN - more effort is required to increase the activity of the motor population, which  
546 is continuously inhibited by the STN, to initiate an action. Today, the mechanism for  
547 motor and information processing deficits in PD patients is still under extensive study.  
548 PD is considered not only a disease caused by degeneration of substantia nigra dopamin-  
549 ergic neurons, but also a system-level disease caused by dysfunction of the cortical-BG  
550 circuit [67]. Therefore, both the hyperactivity of the STN and the altered cost/reward  
551 ratio can be considered parts of PD pathophysiology, and contribute to the motor deficits  
552 in PD patients.

### 553 **3.6 Conclusions**

554 In conclusion, the current study aims to advance our understanding on the computations  
555 underlying action regulations in tasks that involve action inhibition, the failure of which  
556 contributes to various neuropsychiatric diseases. We proposed a large scale neurodynam-  
557 ical computational framework that combines dynamic neural field theory with stochastic  
558 optimal control theory to simulate the mechanisms of action regulation and to predict  
559 how disruption of this mechanism lead to motor deficits in PD patients. We evaluated the  
560 model predictions by comparing the motor behavior of neurotypical individuals and PD  
561 patients in three tasks that require action inhibition. To the best of our knowledge, our  
562 results revealed for the first time an integrated mechanism of action regulation that affects  
563 both action planning and action inhibition. When this mechanism is disrupted (as in PD  
564 patients), motor behavior is affected, leading to longer reaction times and higher error



565 rates in decisions and actions. Overall, our findings provide significant insight on how the  
566 brain regulates actions that involve inhibition, and open new avenues for improving and  
567 developing therapeutic interventions for diseases that may involve these circuits.

## 568 **4 Methods**

### 569 **4.1 Participants**

570 A sample of 15 adults with PD and 32 neurologically healthy, age-matched adults took  
571 part in the study. The study was approved by the University of California, Los Angeles  
572 Review Board and all individuals signed an informed consent before participating.

### 573 **4.2 Stimuli and Procedure**

#### 574 **4.2.1 Decision-Making Task**

575 All experiments were programmed using Psychtoolbox 3 for Matlab. Experimental setup  
576 is shown in Figure 1. In the decision-making task, participants sat in a dark room in front  
577 of a 22-inch Dell LED monitor where stimuli would be presented on. The screen was ap-  
578 proximately 50 cm away from the participant. A two-dimensional joystick (Thrustmaster  
579 T.16000M FCS, maximum range of axis value is  $-32,000$   $+32,000$ ) was placed in front  
580 of the monitor. During the task, the participants were instructed to move the joystick  
581 towards the left or right direction using their right hand in reaction to the corresponding  
582 stimulus. Each trial started with the screen turning black. After 1.0-1.1 s, a white fixation  
583 cross appeared in the center of the black screen for 1.0-1.1 s, then the white fixation cross  
584 disappeared, and four white arrows appear in the center of the black screen. In 50% of  
585 the trials (choice trials), two of the arrows pointed to the left, and the other two to the

586 right (e.g. < < > >), in which case the participant needed to freely decide whether they  
587 would move the joystick to the left or right. In the other 50% of the trials (instructed  
588 trials), the four arrows were pointing to the same direction (left or right) (e.g. < < <  
589 <), in which case the participant needed to move the joystick towards the direction the  
590 arrows were pointing to. The arrows remained on the screen for up to 1.5 s before they  
591 disappear, then the screen turned black for 0.5 s. If the participant responded to the  
592 stimulus by moving the joystick to the left or right (axis value threshold for response:  
593 -25000 to the left/+25000 to the right) when the arrows were presented on the screen,  
594 after 10ms, the screen would turn black for the remaining of the 1.5 s plus 0.5 s, after  
595 which the screen would remain black and the next trial would start. If the joystick did  
596 not return to the baseline (axis value between -2500 and +2500), the next trial would not  
597 start until the joystick returned to the baseline. Every participant performed 2 blocks  
598 of trials, with 52 trials in each block. In each block of trials, there are 26 choice trials  
599 and 26 instructed trials. The trial type (choice or instructed) were randomized. Before  
600 each trial, the participant did not know whether the next trial would be a choice trial or  
601 an instructed trial. The RT for each trial was recorded as the time interval between the  
602 appearance of the arrows on the screen and the participant's response.

#### 603 **4.2.2 Eriksen flanker Task**

604 An arrow version of the Eriksen flanker Task [98] with arrows pointing to the left and  
605 right was performed in our study. During the Eriksen Flanker task, the same equipment  
606 as described in 3.2.1 were used, the major difference being that in each trial, the target  
607 stimulus was flanked by stimuli which were pointing to the opposite direction of the target  
608 arrow (incongruent trial) or to the same direction as the target arrow (congruent trial),  
609 and every participant was told to move the joystick towards the same direction as the

610 target arrow using his/her right hand. In each trial, the screen first turned black for 1.0-  
611 1.1 s, then a white fixation cross appeared in the center of the screen for 1.0-1.1 s. After  
612 this interval, four white flanker arrows pointing to one direction (left or right) appeared  
613 in the center of the screen, leaving a blank space in the middle (e.g. < < < <). After  
614 100 ms, a white target arrow appeared in the blank space, pointing either to the opposite  
615 direction of the flankers (incongruent trial) or the same direction (congruent trial). The  
616 target arrow and the flankers remained on the screen for up to 1.5 s, then disappeared,  
617 and the screen turned black for 0.5 s. If the participant responded to the target arrow by  
618 moving the joystick to the left or right, after 10ms, the screen would turn black for the  
619 remaining of the 1.5 s plus 0.5 s, after which if the joystick returned to baseline, the screen  
620 would remain black and start the next trial. Each participant performed two blocks of  
621 trials, with 52 trials in each block, making a total of 104 trials. In each block of trials,  
622 there are 26 incongruent trials and 26 congruent trials. The direction of the target arrows  
623 and the type of flanker (incongruent or congruent) were randomized. The RT for each  
624 trial was recorded as the time interval between the appearance of the target arrow and  
625 the participant's response.

### 626 **4.2.3 Stop Signal Task**

627 A trial in a stop signal task is either a go trial or a stop trial. In each trial, arrows pointing  
628 to the left or right direction were presented on the screen as a stimulus. In a go trial (no  
629 stop signal is presented), the participant should respond as fast as possible by moving the  
630 joystick towards the direction the arrows were pointing to. In a stop trial, the participant  
631 should try to inhibit their response after the stop signal was cued. Participants were told  
632 that stop was not always possible, and that stop trials and go trials are equally important.  
633 Before the experiment, each participant performed 24 training trials, including 16 go trials

634 and 8 stop trials. At the beginning of a trial, the screen turned black. After 1.0-1.1 s, a  
635 white fixation cross appeared in the center of the screen for 1.0-1.1 s, then the fixation  
636 cross disappeared, and four white arrows pointing to the left or right appeared in the  
637 center of the screen. In a go trial, the arrows remained on the screen for up to 1.5 s before  
638 they disappeared, then the screen turned black for 0.5 s. If the participant responded  
639 to the stimulus by moving the joystick when the arrows were presented on the screen,  
640 after 10ms, the screen turned black for the remaining of the 1.5 s plus 0.5 s, after which  
641 if the joystick returned to baseline, the screen remained black and the next trial was  
642 started. A stop trial is nearly identical to a go trial, except that the arrows turned red  
643 after an interval termed “stop signal delay” (SSD) indicating that the participant should  
644 abandon any response immediately. If the participant inhibited their actions, the arrows  
645 remained on the screen for the rest of 1.5 s, and in the subsequent stop trial, the SSD  
646 would increase by 50 ms, making inhibition more challenging. If the participant failed to  
647 inhibit their actions, after 10 ms, the arrows disappeared, and the screen turned black for  
648 the remaining of the 1.5 s plus 0.5 s, after which if the joystick returned to the baseline,  
649 the screen remained black and the next trial would start. In this case, the SSD would  
650 decrease by 50 ms, making it easier to inhibit actions. Each participant performed 3  
651 blocks of trials, with 60 trials in each block. In each block of trials, there were 40 go  
652 trials and 20 stop trials. The direction of the arrows and the type of trial (go or stop)  
653 were randomized. The RT for each go trial and failed stop trial were recorded as the time  
654 interval between the appearance of white arrows and the participant’s response.

### 655 **4.3 Statistical Analysis**

656 Cubic interpolating splines were used to smooth the reach trajectories and compute the  
657 velocity of the movements. Reaction time (RT) was defined as the time between the target

658 appearance and the time that reach velocity exceeded 10% of the maximum velocity.  
659 RTs faster than 100ms were removed because anticipation is considered to be involved  
660 prior to actions, as well as RTs longer than 1500ms. RT outliers (RTs >3 standard  
661 deviations below or above the mean RT) were also excluded from the analysis. The trials  
662 in which the participant changed their mind (moving towards one direction past 5% of the  
663 maximum range, and then changed their mind to move towards the other direction) were  
664 also excluded from further analysis. RTs across all participants were pooled together, and  
665 for the decision making task and the Eriksen flanker task, two-way ANOVA analysis was  
666 performed to determine the group differences in RTs. For the stop signal task, two-sample  
667 t-test was performed to determine the group differences in go trial RTs.

#### 668 **4.4 Computational Model Architecture**

669 We developed a neurodynamical framework based on our previous studies [38,39] to model  
670 the three action regulation functions. The computational framework combines dynamic  
671 neural field (DNF) theory with stochastic optimal control theory, and includes circuitry  
672 for perception, expected outcome, effort cost, context signal, pause, action planning and  
673 execution. Each DNF simulates the dynamic evolution of firing rate activity of a network  
674 of neurons over a continuous space with local excitation and surround inhibition. The  
675 functional properties of each DNF are determined by the lateral inhibition within the field  
676 and the connections with other fields in the architecture. The projections between the  
677 fields can be topologically organized – i.e., each neuron  $i$  in the field drives the activation  
678 at the corresponding neuron  $i$  in the other field (one-to-one connections), or unordered –  
679 i.e., each neuron in one field is connected with all neurons on the other field (one-to-all  
680 connections). The activity of a field  $j$  evolves over time under the influence of external  
681 inputs, local excitation and lateral inhibition interactions within the field, as well as

682 interactions with other  $k$  fields, as described by Equation (1):

$$\tau \dot{u}_j(x, t) = -u_j(x, t) + h_j + S_j(x, t) + [w_j \otimes f_j(u_j)](x, t) + \sum_k [w_{kj} \otimes f_k(u_k)](x, t) \quad (1)$$

683 where  $u(x, t)$  is the local activity of the DNF at the position  $x$  and time  $t$ , and  $\dot{u}_j(x, t)$   
684 is the rate of change of the activity over time scale by a time constant  $\tau$ . If there is  
685 no external input  $S(x, t)$ , the field converges over time to the resting state  $h$  from the  
686 current level of activation. The first convolution term  $[w_j \otimes f_j(u_j)](x, t) = \int w(x -$   
687  $x') f[u(x', t)] dx'$  models interactions between the simulated neurons at different locations  
688 within the field  $j$ , and is shaped by the interaction kernel of Equation (2), which consists  
689 of both excitatory and inhibitory components:

$$w(x - x') = C_{exc} e^{-\frac{(x-x')^2}{2\sigma_{exc}^2}} - C_{inh} e^{-\frac{(x-x')^2}{2\sigma_{inh}^2}} \quad (2)$$

690 where  $C_{exc}$ ,  $C_{inh}$ ,  $\sigma_{exc}$  and  $\sigma_{inh}$  describe the amplitude and the width of the excitatory  
691 and the inhibitory components, respectively. We convolved the kernel function with a  
692 sigmoidal transformation of the field so that the neurons with activity above a threshold  
693 participate in the intra-field interactions:

$$f_j(u_j(x)) = \frac{1}{1 + e^{-\beta(u_j(x))}} \quad (3)$$

694 in which the steepness of the sigmoid function was controlled by  $\beta$ .

695 The function  $w_{jk}$  describes the connectivity kernel between fields  $u_j$  and  $u_k$  showing  
696 the contribution of field  $u_k$  to the dynamics of field  $u_j$ . The sigmoid  $f_k(u_k)$  and  $w_{jk}$  are  
697 convolved to determine the full contribution from field  $u_k$  to  $u_j$ .

698 The architectural organization of the framework is shown in Figure 4. The “reach  
699 planning” field encodes the potential movement directions, and is responsible for initi-  
700 ating the reaching movements. The “spatial sensory input” field encodes the angular  
701 representations of the competing targets. The “expected outcome” field encodes the ex-  
702 pected reward for reaching to a particular direction centered on the hand position. The  
703 outputs of these two fields send excitatory projections (green arrows) to the reach plan-  
704 ning field in a topological manner. The “reach cost” field encodes the effort cost required  
705 to implement an action at a given time and state. The reach cost field sends inhibitory  
706 projections (red arrow) to the reach planning field to penalize high-effort actions. For  
707 instance, an action that requires changing of moving direction is more “costly” than an  
708 action of keep going in the same direction. The “pause” field suppresses the activity of the  
709 reach planning field to inhibit planned or ongoing actions via inhibitory projections to the  
710 reach planning field. The stop signal field and the conflict signal field encode information  
711 related to the contextual requirement of the task (i.e., stopping cue or flanker distractor),  
712 and send one-to-all excitatory projections to the corresponding population of the pause  
713 field. In particular, the stop signal field is projected to the neuronal population of the  
714 pause field which is responsible for outright stopping of action, whereas the conflict signal  
715 field projects to the neuronal population of the pause field, which is responsible for delay-  
716 ing decisions when conflicting information is detected. Each of the context signal fields  
717 (stop signal field and conflict signal field) consists of 100 neurons, whereas the pause field  
718 consists of 3 neuronal sub-populations, each consists of 75 neurons. The rest of the fields  
719 consist of 181 neurons with a preferred direction between 0 to 180 degrees. The activity  
720 of the reach planning field  $S_{action}$  is given as the sum of the outputs of the fields encoding  
721 the position of the target  $v_{pos}$ , the expected reward  $v_{reward}$ , the estimated reach cost  $v_{cost}$ ,  
722 and the activity from the pause field  $v_{pau}$ , at any given time and state, corrupted by a

723 Gaussian distributed additive noise  $\xi$ .

$$S_{action} = \eta_{loc}v_{pos} + \eta_{reward}v_{reward} - \eta_{cost}v_{cost} - \eta_{pau}v_{pau} + \xi \quad (4)$$

724 where  $\eta_{loc}$ ,  $\eta_{reward}$ ,  $\eta_{cost}$  and  $\eta_{pau}$  are scalar values that weigh the influence of the  
725 spatial sensory input field, the expected outcome field, the reach cost and the pause field,  
726 respectively, to the activity of the reach planning field. The values of the model parameters  
727 are given in S1 Table. The normalized activity of the reach planning field describes the  
728 relative desirability  $d_i$  of each “reach neuron” with respect to the alternative options at  
729 time  $t$  – i.e., the higher the activity of a reach neuron  $j$ , the higher the desirability to  
730 move towards the preferred direction  $\varphi_j$  of this neuron with respect to the alternatives  
731 at a given time  $t$ . Each neuron  $j$  in the reach planning field is connected with a control  
732 scheme that generates reaching trajectories. Once the activity of that neuron exceeds the  
733 action initiation threshold  $\gamma$ , the controller is triggered and generates an optimal policy  
734  $\pi_j$ , a sequence of motor actions towards the preferred direction of the neuron  $j$ . The  
735 optimal policy is given by minimization of the cost function:

$$J_j(\mathbf{x}_t, \pi_j) = (\mathbf{x}_{T_j} - S\mathbf{p}_j)^T Q_{T_j} (\mathbf{x}_{T_j} - S\mathbf{p}_j) + \sum_{t=1}^{T_j-1} \pi_j(\mathbf{x}_t)^T R \pi_j(\mathbf{x}_t) \quad (5)$$

736 where  $\pi_j(\mathbf{x}_t)$  is the policy from the time  $t = 1$  to  $t = T_j$  to reach towards the preferred  
737 direction  $\varphi_j$ ;  $T_j$  is the time required to arrive at position  $\mathbf{p}_j$ ;  $\mathbf{p}_j$  is the position planned  
738 to arrive (goal position) at the end of the reaching movement, given by  $\mathbf{p}_j = [\text{rcos}(\varphi_j),$   
739  $\text{rsin}(\varphi_j)]$ , in which  $r$  is the distance between the current location of the hand and the  
740 location of the stimulus encoded by the neuron  $j$ .  $\mathbf{x}_{T_j}$  is the state vector at the end of  
741 the reaching movement, and matrix  $S$  selects the actual position of the hand and the goal  
742 position at the end of the reaching movement from the state vector. Matrices  $Q_{T_j}$  and  $R$



743 define the cost dependent on precision and control, respectively. More details about the  
744 optimal control model are described in [38, 39]. Consequently, a action is initiated once  
745 a neuronal population exceeds the action initiation threshold and the executed action  
746  $\boldsymbol{\pi}_{mix}(\mathbf{x}_t)$  is given as a mixture of the active policies (i.e., policies with active neurons)  
747 weighted by relative desirability values of the corresponding neurons at any given time  
748 and state.

$$\boldsymbol{\pi}_{mix}(\mathbf{x}_t) = \sum_j^{j+M} d_j(\mathbf{x}_t) \boldsymbol{\pi}_j(\mathbf{x}_t) \quad (6)$$

749 where  $\mathbf{x}_t$  is the state of the system at time  $t$  (i.e., position, velocity, orientation of  
750 the trajectory),  $d_j$  is the normalized activity of the neuron  $j$  (i.e., relative desirability  
751 value of the neuron  $j$ ), and  $\boldsymbol{\pi}_j$  is the optimal policy generated by the controller connected  
752 with neuron  $j$ . Because desirability is time- and state-dependent, the weighted mixture of  
753 the individual policies can change/correct the current trajectory in the presence of new  
754 incoming information - e.g., a stop signal cued while acting. In order to handle contin-  
755 gencies during the movement, the “receding horizon control”(RHC) [99, 100] technique,  
756 also known as model predictive control (MPC), which is widely used in stochastic optimal  
757 control models, was implemented in the framework. According to RHC, the framework  
758 would only execute the initial portion of the sequence of actions for a short period of time  
759  $\tau$  ( $\tau = 9$  in our framework), after which the framework would recompute the optimal  
760 policy  $\boldsymbol{\pi}_{mix}(\mathbf{x}_t + \tau)$  from time  $t+\tau$  to  $t+\tau+T_i$ , and this approach would continue until  
761 the hand reaches one of the targets.

## 762 **Acknowledgments**

763 Research reported in this publication was supported by National Institute of Neurological  
764 Disease and Stroke of the National Institutes of Health under award number U01NS098961  
765 and R01NS097782. The content is solely the responsibility of the authors and does not  
766 necessarily represent the official views of the National Institutes of Health.

## 767 **Author Contributions**

768 N.P. and V.N.C conceived the study.; J.C., M.M, N.P. and V.N.C designed the exper-  
769 iment; N.H., D.B. and M.M. recruited subjects and collected the data; S.Z. and J.C.  
770 performed the data analysis; S.Z designed the neurocomputational model and performed  
771 the simulations; S.Z drafted the manuscript with substantial contribution from N.P. and  
772 V.N.C; S.Z, J.C., N.P. and V.N.C. revised and approved the manuscript.

## 773 **Data Availability**

774 All relevant data are within the manuscript and its supporting information files and will  
775 be uploaded to the Open Science Framework (OSF) upon approval for publication.

## 776 **References**

- 777 1. Gauggel S, Rieger M, and Feghoff TA. Inhibition of ongoing responses in pa-  
778 tients with parkinson's disease. *Journal of Neurology, Neurosurgery & Psychiatry*,  
779 75(4):539–544, 2004.

- 780 2. Wylie SA, van den Wildenberg WPM, Ridderinkhof KR, Bashore TR, Powell VD,  
781 Manning CA, and Wooten GF. The effect of parkinson's disease on interference  
782 control during action selection. *Neuropsychologia*, 47(1):145–157, 2009.
- 783 3. Yaniv A, Benaroya-Milshtein N, Steinberg T, Ruhrrman D, Apter A, and Lavidor  
784 M. Specific executive control impairments in tourette syndrome: The role of  
785 response inhibition. *Research in developmental disabilities*, 61:1–10, 2017.
- 786 4. Morein-Zamir S, Fineberg NA, Robbins TW, and Sahakian BJ. Inhibition of  
787 thoughts and actions in obsessive-compulsive disorder: extending the endopheno-  
788 type? *Psychological medicine*, 40(2):263–272, 2010.
- 789 5. van Velzen LS, Vriend C, de Wit SJ, and van den Heuvel OA. Response inhibition  
790 and interference control in obsessive–compulsive spectrum disorders. *Frontiers in*  
791 *human neuroscience*, 8:419, 2014.
- 792 6. Cisek P. Cortical mechanisms of action selection: the affordance competition  
793 hypothesis. *Philosophical Transactions of the Royal Society B: Biological Sciences*,  
794 362(1485):1585–1599, 2007.
- 795 7. Cisek P and Kalaska JF. Neural mechanisms for interacting with a world full of  
796 action choices. *Annual review of neuroscience*, 33:269–298, 2010.
- 797 8. Gallivan JP, Barton KS, Chapman CS, Wolpert DM, and Flanagan JR. Action  
798 plan co-optimization reveals the parallel encoding of competing reach movements.  
799 *Nature communications*, 6(1):1–9, 2015.
- 800 9. Gallivan JP, Logan L, Wolpert DM, and Flanagan JR. Parallel specification of  
801 competing sensorimotor control policies for alternative action options. *Nature*  
802 *neuroscience*, 19(2):320, 2016.

- 803 10. Gallivan JP, Chapman CS, Wolpert DM, and Flanagan JR. Decision-making in  
804 sensorimotor control. *Nature Reviews Neuroscience*, 19(9):519–534, 2018.
- 805 11. McPeck RM, Han JH, and Keller EL. Competition between saccade goals in  
806 the superior colliculus produces saccade curvature. *Journal of neurophysiology*,  
807 89(5):2577–2590, 2003.
- 808 12. Cisek P and Kalaska JF. Neural correlates of reaching decisions in dorsal premotor  
809 cortex: specification of multiple direction choices and final selection of action.  
810 *Neuron*, 45(5):801–814, 2005.
- 811 13. Baumann MA, Fluet MC, and Scherberger H. Context-specific grasp movement  
812 representation in the macaque anterior intraparietal area. *Journal of Neuroscience*,  
813 29(20):6436–6448, 2009.
- 814 14. Eriksen CW and Schultz DW. Information processing in visual search: A con-  
815 tinuous flow conception and experimental results. *Perception & psychophysics*,  
816 25(4):249–263, 1979.
- 817 15. Miller J. Discrete versus continuous stage models of human information process-  
818 ing: in search of partial output. *Journal of Experimental Psychology: Human*  
819 *Perception and Performance*, 8(2):273, 1982.
- 820 16. Gratton G, Coles MG, Sirevaag EJ, Eriksen CW, and Donchin E. Pre-and post-  
821 stimulus activation of response channels: a psychophysiological analysis. *Journal*  
822 *of Experimental Psychology: Human perception and performance*, 14(3):331, 1988.
- 823 17. Chapman CS, Gallivan JP, Wood DK, Milne JL, Culham JC, and Goodale MA.  
824 Reaching for the unknown: multiple target encoding and real-time decision-  
825 making in a rapid reach task. *Cognition*, 116(2):168–176, 2010.

- 826 18. Chou IH, Sommer MA, and Schiller PH. Express averaging saccades in monkeys.  
827 *Vision research*, 39(25):4200–4216, 1999.
- 828 19. Enachescu V, Schrater P, Schaal S, and Christopoulos V. Action planning and con-  
829 trol under uncertainty emerge through a desirability-driven competition between  
830 parallel encoding motor plans. *PLoS computational biology*, 17(10):e1009429, 2021.
- 831 20. Mars RB, Piekema C, Coles MG, Hulstijn W, and Toni I. On the programming  
832 and reprogramming of actions. *Cerebral Cortex*, 17(12):2972–2979, 2007.
- 833 21. Li CS, Huang C, Constable RT, and Sinha R. Imaging response inhibition in  
834 a stop-signal task: neural correlates independent of signal monitoring and post-  
835 response processing. *Journal of Neuroscience*, 26(1):186–192, 2006.
- 836 22. Ray NJ, Brittain JS, Holland P, Joundi RA, Stein JF, Aziz TZ, and Jenkinson  
837 N. The role of the subthalamic nucleus in response inhibition: evidence from  
838 local field potential recordings in the human subthalamic nucleus. *Neuroimage*,  
839 60(1):271–278, 2012.
- 840 23. Wessel JR, Jenkinson N, Brittain JS, Voets SH, Aziz TZ, and Aron AR. Sur-  
841 prise disrupts cognition via a fronto-basal ganglia suppressive mechanism. *Nat*  
842 *Commun.*, 7, 2016.
- 843 24. González-Villar AJ, Bonilla FM, and Carrillo de-la Peña MT. When the brain  
844 simulates stopping: neural activity recorded during real and imagined stop-signal  
845 tasks. *Cognitive, Affective, & Behavioral Neuroscience*, 16(5):825–835, 2016.
- 846 25. Wagner J, Wessel JR, Ghahremani A, and Aron AR. Establishing a right frontal  
847 beta signature for stopping action in scalp eeg: implications for testing inhibitory

- 848 control in other task contexts. *Journal of cognitive neuroscience*, 30(1):107–118,  
849 2018.
- 850 26. Bastin J, Polosan M, Benis D, Goetz L, Bhattacharjee M, Piallat B, Krainik A,  
851 Bougerol T, Chabardes S, and David O. Inhibitory control and error monitoring  
852 by human subthalamic neurons. *Transl Psychiatry*, 4(9), 2014.
- 853 27. Benis D, David O, Piallat B, Kibleur A, Goetz L, Bhattacharjee M, Fraix V,  
854 Seigneuret E, Krack P, Chabardes S, and Bastin J. Response inhibition rapidly in-  
855 creases single-neuron responses in the subthalamic nucleus of patients with parkin-  
856 son’s disease. *Cortex*, 84:111–123, 2016.
- 857 28. Chen X, Scangos KW, and Stuphorn V. Supplementary motor area exerts  
858 proactive and reactive control of arm movements. *Journal of Neuroscience*,  
859 30(44):14657–14675, 2010.
- 860 29. Pani P, Giarrocco F, Giamundo M, Montanari R, Brunamonti E, and Ferraina  
861 S. Visual salience of the stop signal affects the neuronal dynamics of controlled  
862 inhibition. *Scientific reports*, 8(1):1–13, 2018.
- 863 30. Schmidt R, Leventhal DK, Mallet N, Chen F, and Berke JD. Canceling actions  
864 involves a race between basal ganglia pathways. *Nat Neurosci.*, 16(8):1118–1124,  
865 2013.
- 866 31. Parent A and Hazrati LN. Functional anatomy of the basal ganglia. i. the cortico-  
867 basal ganglia-thalamo-cortical loop. *Brain research reviews*, 20(1):91–127, 1995.
- 868 32. Aron AR, Fletcher PC, Bullmore ET, Sahakian BJ, and Robbins TW. Stop-signal  
869 inhibition disrupted by damage to right inferior frontal gyrus in humans. *Nature*  
870 *neuroscience*, 6(2):115–116, 2003.

- 871 33. Chambers CD, Bellgrove MA, Stokes MG, Henderson TR, Garavan H, Robertson  
872 IH, Morris AP, and Mattingley JB. Executive “brake failure” following deacti-  
873 vation of human frontal lobe. *Journal of cognitive neuroscience*, 18(3):444–455,  
874 2006.
- 875 34. Haynes WI and Haber SN. The organization of prefrontal-subthalamic inputs  
876 in primates provides an anatomical substrate for both functional specificity and  
877 integration: implications for basal ganglia models and deep brain stimulation.  
878 *Journal of Neuroscience*, 33(11):4804–4814, 2013.
- 879 35. Aron AR and Poldrack RA. Cortical and subcortical contributions to stop signal  
880 response inhibition: role of the subthalamic nucleus. *Journal of Neuroscience*,  
881 26(9):2424–2433, 2006.
- 882 36. Aron AR, Behrens TE, Smith S, Frank MJ, and Poldrack RA. Triangulating  
883 a cognitive control network using diffusion-weighted magnetic resonance imaging  
884 (mri) and functional mri. *Journal of Neuroscience*, 27(14):3743–3752, 2007.
- 885 37. Rae CL, Hughes LE, Anderson MC, and Rowe JB. The prefrontal cortex achieves  
886 inhibitory control by facilitating subcortical motor pathway connectivity. *Journal*  
887 *of neuroscience*, 35(2):786–794, 2015.
- 888 38. Christopoulos V, Bonaiuto J, and Andersen RA. A biologically plausible computa-  
889 tional theory for value integration and action selection in decisions with competing  
890 alternatives. *PLoS Comput Biol*, 11(3):e1004104, 2015.
- 891 39. Christopoulos V and Schrater PR. Dynamic integration of value information into  
892 a common probability currency as a theory for flexible decision making. *PLoS*  
893 *Comput Biol*, 11(9):e1004402, 2015.

- 894 40. Luce RD et al. *Response times: Their role in inferring elementary mental orga-*  
895 *nization*. Number 8. Oxford University Press on Demand, 1986.
- 896 41. Ramautar JR, Kok A, and Ridderinkhof KR. Effects of stop-signal probability  
897 in the stop-signal paradigm: The n2/p3 complex further validated. *brain and*  
898 *cognition*. *Brain Cogn.*, 56(2):234–252, 2004.
- 899 42. Van de Laar MC, Wildenberg WP, Boxtel GJ, and MW Molen. Processing of  
900 global and selective stop signals: Application of donders’ subtraction method to  
901 stop-signal task performance. *Exp Psychol.*, 57(2):149–159, 2010.
- 902 43. Sandamirskaya Y. Dynamic neural fields as a step toward cognitive neuromorphic  
903 architectures. *Frontiers in Neuroscience*, 7(276), 2014.
- 904 44. Knips G, Zibner SK, Reimann H, and Schöner G. A neural dynamics architecture  
905 for grasping that integrates perception and movement generation and enables on-  
906 line updating. *Frontiers in neurorobotics*, 11(9), 2017.
- 907 45. Todorov E. Stochastic optimal control and estimation methods adapted to the  
908 noise characteristics of the sensorimotor system. *Neural computation*, 17(5):1084–  
909 1108, 2005.
- 910 46. Diedrichsen J, Shadmehr R, and Ivry RB. The coordination of movement: optimal  
911 feedback control and beyond. *Trends Cogn Sci.*, 14(1):31–39, 2010.
- 912 47. Verbruggen F and Logan GD. Response inhibition in the stop-signal paradigm.  
913 *Trends in cognitive sciences*, 12(11):418–424, 2008.
- 914 48. Verbruggen F and Logan GD. Proactive adjustments of response strategies in the  
915 stop-signal paradigm. *J Exp Psychol Hum Percept Perform.*, 35(3):835–854, 2009.



- 916 49. Zandbelt BB, Bloemendaal M, Neggens SF, Kahn RS, and Vink M. Expectations  
917 and violations: delineating the neural network of proactive inhibitory control.  
918 *Hum Brain Mapp.*, 34(9):2015–2024, 2013.
- 919 50. Verbruggen F, Aron AR, Band GP, Beste C, Bissett PG, Brockett AT, Brown JW,  
920 Chamberlain SR, Chambers CD, Colonius H, Colzato LS, Corneil BD, Coxon JP,  
921 Dupuis A, Eagle DM, Garavan H, Greenhouse I, Heathcote A, Huster RJ, Jahfari  
922 S, Kenemans JL, Leunissen I, Li CR, Logan GD, Matzke D, Morein-Zamir S,  
923 Murthy A, Paré M, Poldrack RA, Ridderinkhof KR, Robbins TW, Roesch M,  
924 Rubia K, Schachar RJ, Schall JD, Stock AK, Swann NC, Thakkar KN, van der  
925 Molen MW, Vermeylen L, Vink M, Wessel JR, Whelan R, Zandbelt BB, and  
926 Boehler CN. A consensus guide to capturing the ability to inhibit actions and  
927 impulsive behaviors in the stop-signal task. *Elife*, 8(e46323), 2019.
- 928 51. Jahfari S, Stinear CM, Claffey M, Verbruggen F, and Aron AR. Responding  
929 with restraint: what are the neurocognitive mechanisms? *J Cogn Neurosci.*,  
930 22(7):1479–1492, 2010.
- 931 52. Padoa-Schioppa C and Assad JA. Neurons in the orbitofrontal cortex encode  
932 economic value. *Nature*, 441(7090):223–226, 2006.
- 933 53. Padoa-Schioppa C. Neurobiology of economic choice: a good-based model. *Annual*  
934 *review of neuroscience*, 34:333–359, 2011.
- 935 54. Tversky A and Kahneman D. The framing of decisions and the psychology of  
936 choice. *science*, 211(4481):453–458, 1981.

- 937 55. Cai X and Padoa-Schioppa C. Neuronal encoding of subjective value in dorsal  
938 and ventral anterior cingulate cortex. *Journal of Neuroscience*, 32(11):3791–3808,  
939 2012.
- 940 56. Baumann MA, Fluet MC, and Scherberger H. Context-specific grasp move-  
941 ment representation in the macaque anterior intraparietal area. *J Neurosci.*,  
942 29(20):6436–48, 2009.
- 943 57. Archambault PS, Ferrari-Toniolo S, and Battaglia-Mayer A. Online control of  
944 hand trajectory and evolution of motor intention in the parietofrontal system.  
945 *Journal of Neuroscience*, 31(2):742–752, 2011.
- 946 58. Boucher L, Palmeri TJ, Logan GD, and Schall JD. Inhibitory control in mind  
947 and brain: an interactive race model of countermanding saccades. *Psychological*  
948 *review*, 114(2):376, 2007.
- 949 59. Orban de Xivry JJ and Lefèvre P. A switching cost for motor planning. *Journal*  
950 *of neurophysiology*, 116(6):2857–2868, 2016.
- 951 60. Logan GD and Cowan WB. On the ability to inhibit thought and action: A theory  
952 of an act of control. *Psychological review*, 91(3):295, 1984.
- 953 61. Swann N, Tandon N, Canolty R, Ellmore TM, McEvoy LK, Dreyer S, DiSano  
954 M, and Aron AR. Intracranial eeg reveals a time-and frequency-specific role for  
955 the right inferior frontal gyrus and primary motor cortex in stopping initiated  
956 responses. *Journal of Neuroscience*, 29(40):12675–12685, 2009.
- 957 62. Wessel JR, Conner CR, Aron AR, and Tandon N. Chronometric electrical stim-  
958 ulation of right inferior frontal cortex increases motor braking. *Journal of Neuro-*  
959 *science*, 33(50):19611–19619, 2013.

- 960 63. Thura D, Beauregard-Racine J, Fradet CW, and Cisek P. Decision making by  
961 urgency gating: theory and experimental support. *Journal of neurophysiology*,  
962 108(11):2912–2930, 2012.
- 963 64. Krajbich I and Rangel A. Multialternative drift-diffusion model predicts the rela-  
964 tionship between visual fixations and choice in value-based decisions. *Proceedings*  
965 *of the National Academy of Sciences*, 108(33):13852–13857, 2011.
- 966 65. Vickers D and Smith P. Accumulator and random-walk models of psychophysical  
967 discrimination: a counter-evaluation. *Perception*, 14(4):471–497, 1985.
- 968 66. Edwards DH. Mutual inhibition among neural command systems as a possible  
969 mechanism for behavioral choice in crayfish. *Journal of Neuroscience*, 11(5):1210–  
970 1223, 1991.
- 971 67. Alexander GE. Biology of parkinson’s disease: pathogenesis and pathophysiology  
972 of a multisystem neurodegenerative disorder. *Dialogues in clinical neuroscience*,  
973 6(3):259, 2004.
- 974 68. Andersen RA and Cui H. Intention, action planning, and decision making in  
975 parietal-frontal circuits. *Neuron*, 63(5):568–583, 2009.
- 976 69. Hadjidimitrakis K, Bakola S, Wong YT, and Hagan MA. Mixed spatial and  
977 movement representations in the primate posterior parietal cortex. *Front Neural*  
978 *Circuits*, 13(15), 2019.
- 979 70. Padoa-Schioppa C and Assad JA. Neurons in the orbitofrontal cortex encode  
980 economic value. *Nature*, 441(7090):223–226, 2006.

- 981 71. O’Doherty JP. Contributions of the ventromedial prefrontal cortex to goal-directed  
982 action selection. *Annals of the New York Academy of Sciences*, 1239(1):118–129,  
983 2011.
- 984 72. Rudebeck PH, Behrens TE, Kennerley SW, Baxter MG, Buckley MJ, Walton  
985 ME, and Rushworth MFS. Frontal cortex subregions play distinct roles in choices  
986 between actions and stimuli. *J Neurosci.*, 28(51):13775–13785, 2008.
- 987 73. Wallis JD and Kennerley SW. Heterogeneous reward signals in prefrontal cortex.  
988 *Curr Opin Neurobiol.*, 20(2):191–198, 2010.
- 989 74. Snyder LH, Batista AP, and Andersen RA. Coding of intention in the posterior  
990 parietal cortex. *Curr Opin Neurobiol.*, 386(6621):167–70, 1997.
- 991 75. Batista AP, Buneo CA, Snyder LH, and Andersen RA. Reach plans in eye-centered  
992 coordinates. *Science*, 285(5425):257–260, 1999.
- 993 76. Pastor-Bernier A and Cisek P. Neural correlates of biased competition in premotor  
994 cortex. *J Neurosci.*, 31(19):7083–7088, 2011.
- 995 77. Pastor-Bernier A, Tremblay E, and Cisek P. Dorsal premotor cortex is involved  
996 in switching motor plans. *Front. Neuroeng.*, 5(5), 2012.
- 997 78. Aron AR, Robbins TW, and Poldrack RA. Inhibition and the right inferior frontal  
998 cortex. *Trends Cogn Sci.*, 8(4):170–177, 2004.
- 999 79. Hampshire A, Chamberlain SR, Monti MM, Duncan J, and Owen AM. The role  
1000 of the right inferior frontal gyrus: inhibition and attentional control. *NeuroImage*,  
1001 50(3):1313–9, 2010.

- 1002 80. Wiecki TV and Frank MJ. A computational model of inhibitory control in frontal  
1003 cortex and basal ganglia. *Psychological review*, 120(2):329, 2013.
- 1004 81. Zavala B, Zaghoul K, and Brown P. The subthalamic nucleus, oscillations, and  
1005 conflict. *Mov Disord.*, 30(3):328–338, 2015.
- 1006 82. Hess CW and Hallett M. The phenomenology of parkinson’s disease. In *Seminars*  
1007 *in neurology*, volume 37, page 109. NIH Public Access, 2017.
- 1008 83. Borrione P, Tranchita E, Sansone P, and Parisi A. Effects of physical activity in  
1009 parkinson’s disease: A new tool for rehabilitation. *World Journal of Methodology*,  
1010 4(3):133, 2014.
- 1011 84. Harrington DL, Shen Q, Theilmann RJ, Castillo GN, Litvan I, Filoteo JV, Huang  
1012 M, and Lee RR. Altered functional interactions of inhibition regions in cognitively  
1013 normal parkinson’s disease. *Frontiers in aging neuroscience*, 10:331, 2018.
- 1014 85. Brittain JS, Watkins KE, Joundi RA, Ray NJ, Holland P, Green AL, Aziz TZ,  
1015 and N Jenkinson. A role for the subthalamic nucleus in response inhibition during  
1016 conflict. *Journal of Neuroscience*, 32(39):13396–13401, 2012.
- 1017 86. Miller WC and DeLong MR. Altered tonic activity of neurons in the globus  
1018 pallidus and subthalamic nucleus in the primate mptp model of parkinsonism. In  
1019 *The basal ganglia II*, pages 415–427. Springer, 1987.
- 1020 87. Remple MS, Bradenham CH, Kao CC, Charles PD, Neimat JS, and Konrad PE.  
1021 Subthalamic nucleus neuronal firing rate increases with parkinson’s disease pro-  
1022 gression. *Movement Disorders*, 26(9):1657–1662, 2011.

- 1023 88. Bogacz R, Brown E, Moehlis J, Holmes P, and Cohen JD. The physics of optimal  
1024 decision making: a formal analysis of models of performance in two-alternative  
1025 forced-choice tasks. *Psychological review*, 113(4):700, 2006.
- 1026 89. Frank MJ. Hold your horses: a dynamic computational role for the subthalamic  
1027 nucleus in decision making. *Neural networks*, 19(8):1120–1136, 2006.
- 1028 90. Cavanagh JF, Wiecki TV, Cohen MX, Figueroa CM, Samanta J, Sherman SJ,  
1029 and Frank MJ. Subthalamic nucleus stimulation reverses mediofrontal influence  
1030 over decision threshold. *Nature neuroscience*, 14(11):1462–1467, 2011.
- 1031 91. Herz DM, Zavala BA, Bogacz R, and Brown P. Neural correlates of decision  
1032 thresholds in the human subthalamic nucleus. *Current Biology*, 26(7):916–920,  
1033 2016.
- 1034 92. Mazzoni P, Hristova A, and Krakauer JW. Why don't we move faster? parkin-  
1035 son's disease, movement vigor, and implicit motivation. *Journal of neuroscience*,  
1036 27(27):7105–7116, 2007.
- 1037 93. Chong TT, Bonnelle V, Manohar S, Veromann KR, Muhammed K, Tofaris GK,  
1038 Hu M, and Husain M. Dopamine enhances willingness to exert effort for reward  
1039 in parkinson's disease. *cortex*, 69:40–46, 2015.
- 1040 94. Salamone JD, Correa M, Farrar A, and Mingote SM. Effort-related functions of  
1041 nucleus accumbens dopamine and associated forebrain circuits. *Psychopharma-*  
1042 *cology*, 191(3):461–482, 2007.
- 1043 95. Walton ME, Kennerley SW, Bannerman DM, Phillips PE, and Rushworth MF.  
1044 Weighing up the benefits of work: behavioral and neural analyses of effort-related  
1045 decision making. *Neural networks*, 19(8):1302–1314, 2006.

- 1046 96. Salamone JD and Correa M. Motivational views of reinforcement: implications  
1047 for understanding the behavioral functions of nucleus accumbens dopamine. *Be-*  
1048 *havioural brain research*, 137(1-2):3–25, 2002.
- 1049 97. Wagenbreth C, Zaehle T, Galazky I, Voges J, Guitart-Masip M, Heinze HJ, and  
1050 Düz el E. Deep brain stimulation of the subthalamic nucleus modulates reward  
1051 processing and action selection in parkinson patients. *Journal of Neurology*,  
1052 262(6):1541–1547, 2015.
- 1053 98. Eriksen BA and Eriksen CW. Effects of noise letters upon the identification of  
1054 a target letter in a nonsearch task. *Perception & psychophysics*, 16(1):143–149,  
1055 1974.
- 1056 99. Mayne DQ, Rawlings JB, Rao CV, and Scokaert POM. Constrained model pre-  
1057 dictive control: Stability and optimality. *Automatica*, 36(6):789–814, 2000.
- 1058 100. Goodwin G, Seron MM, and De Doná JA. *Constrained control and estimation:*  
1059 *an optimisation approach*. Springer Science & Business Media, 2006.

## 1060 **Figure Legends**

1061 **Fig.1 Experimental setup for action regulation tasks that require action inhi-**  
1062 **bition.**(A) Decision-making task, including instructed and choice trials. (B) An arrow  
1063 version of the Eriksen Flanker task, including congruent (the flanker arrows point to the  
1064 same direction as the central arrow) and incongruent (the flanker arrows point to the  
1065 opposite direction from the central arrow) trials. (C) A stop-signal task with instructed  
1066 trials. Individuals are prompted to stop the action when the arrows turn red.

1067

1068 **Fig.2 Behavioral findings from the decision-making task, the Eriksen flanker**  
1069 **task and the stop-signal task.** (A) Bar plots of the RT for neurotypical individuals  
1070 (Neurotypical) and PD patients (PD) in the instructed and choice trials of the decision-  
1071 making task. Error bars correspond to standard error (SE). (B) Bar plots of the RT  
1072 for neurotypical individuals (Neurotypical) and PD patients (PD) in the congruent and  
1073 incongruent trials of the Eriksen flanker task. Error bars correspond to standard error  
1074 (SE). (C) Bar plots of the RT for neurotypical individuals (Neurotypical) and PD patients  
1075 (PD) in the go trials of the stop-signal task. Error bars correspond to standard error (SE).

1076

1077 **Fig.3 Probability to successfully stop an action as a function of the stop signal**  
1078 **delay (SSD).** The probability to successfully stop an action as a function of the SSD for  
1079 neurotypical individuals (Neurotypical,blue) and PD patients (PD,red).

1080

1081 **Fig.4 Model Architecture.** The architectural organization of the neurodynamical the-  
1082 ory to model tasks that involve action inhibition, such as decisions between competing  
1083 options, decisions in the presence of conflicting information and outright stopping of ac-  
1084 tions.

1085

1086 **Fig.5 Simulated reach planning field neuronal activity changes in the deci-**  
1087 **sion making task, Eriksen flanker task and stop-signal task** (A)-(C) Activity  
1088 changes of the 181 neurons in the reach planning field during the decision making task  
1089 (instructed trial and choice trial)(A), the Eriksen flanker task (incongruent trial and con-  
1090 gruent trial)(B), and the stop-signal task (go trial and stop trial)(C) .(D)-(F) Activity  
1091 changes of single neurons in the reach planning field during the decision making task(D),  
1092 the Eriksen flanker task(E), and the stop-signal task(F).



1093

1094 **Fig.6 Simulated behavioral results from the three tasks.** Simulated reaction time  
1095 (RT) for the three experimental tasks predicted by the neurodynamical theory for both  
1096 neurotypical individuals (Neurotypical, blue) and PD patients (PD, red).

1097

1098 **Fig.7 Simulated pause field activity changes during the three tasks** (A) Activity  
1099 changes of single neuron in the pause field during the decision making-task. Cyan trace,  
1100 simulated pause field activity during an instructed trial for a neurotypical individual.  
1101 Magenta trace, simulated pause field activity during an instructed trial for a PD patient.  
1102 Blue trace, simulated pause field activity during a choice trial for a neurotypical individ-  
1103 ual. Red trace, simulated pause field activity during a choice trial for a PD patient. (B)  
1104 Activity changes of single neuron in the pause field during the Eriksen flanker task. Cyan  
1105 trace, simulated pause field activity during a congruent trial for a neurotypical individual.  
1106 Magenta trace, simulated pause field activity during a congruent trial for a PD patient.  
1107 Blue trace, simulated pause field activity during an incongruent trial for a neurotypical  
1108 individual. Red trace, simulated pause field activity during an incongruent trial for a PD  
1109 patient. (C) Activity changes of single neuron in the pause field during the stop-signal  
1110 task. Blue trace, simulated pause field activity during a stop trial for a neurotypical  
1111 individual. Red trace, simulated pause field activity during a stop trial for a PD patient.

1112

1113 **Fig. 8 Simulated probability to successfully stop an action as a function of the**  
1114 **stop signal delay (SSD)** The (simulated) probability to successfully stop an action as  
1115 a function of the SSD for neurotypical individuals (Neurotypical,blue) and PD patients  
1116 (PD,red).

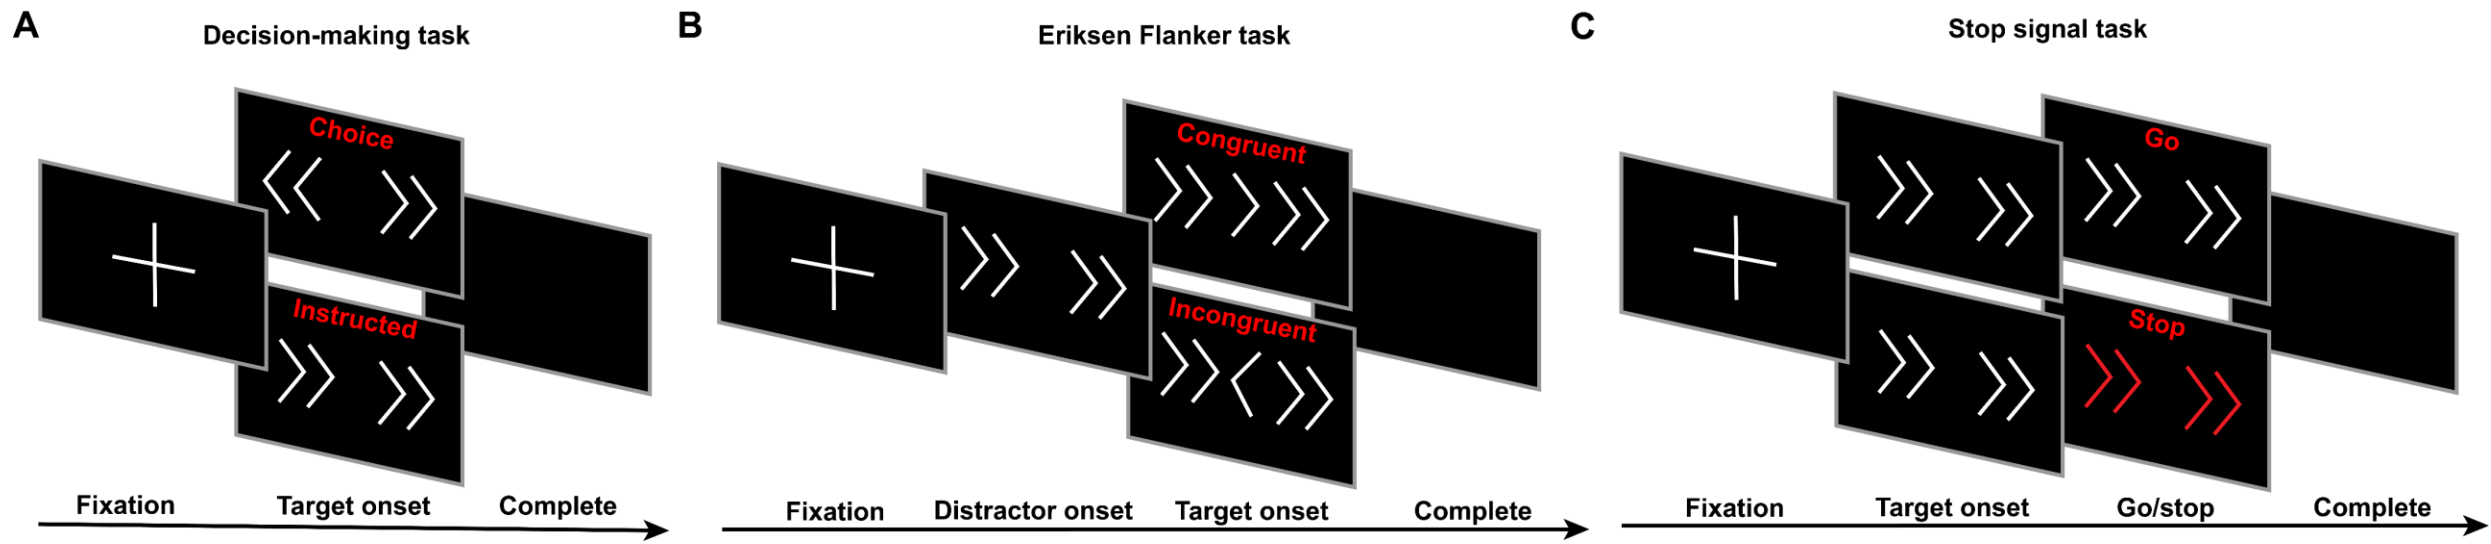

Figure 1

**A**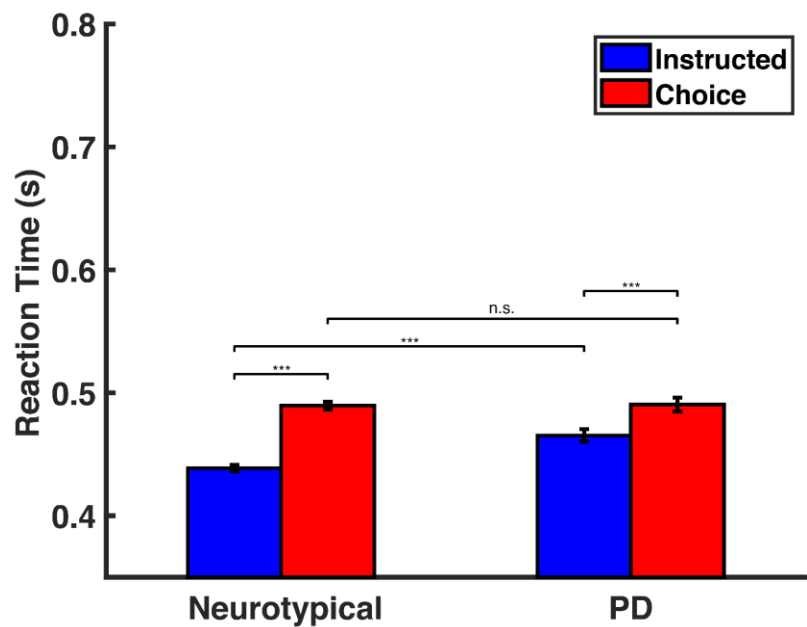**B**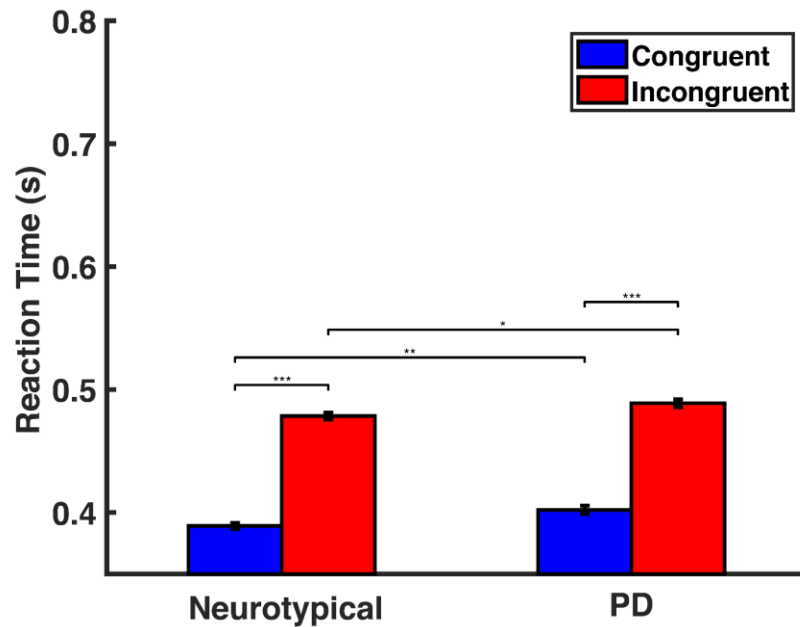**C**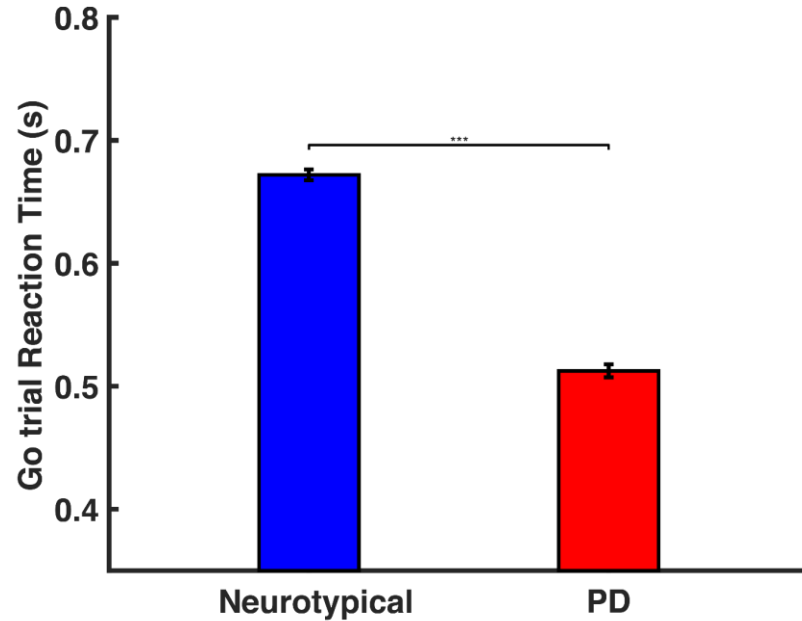**Figure 2**

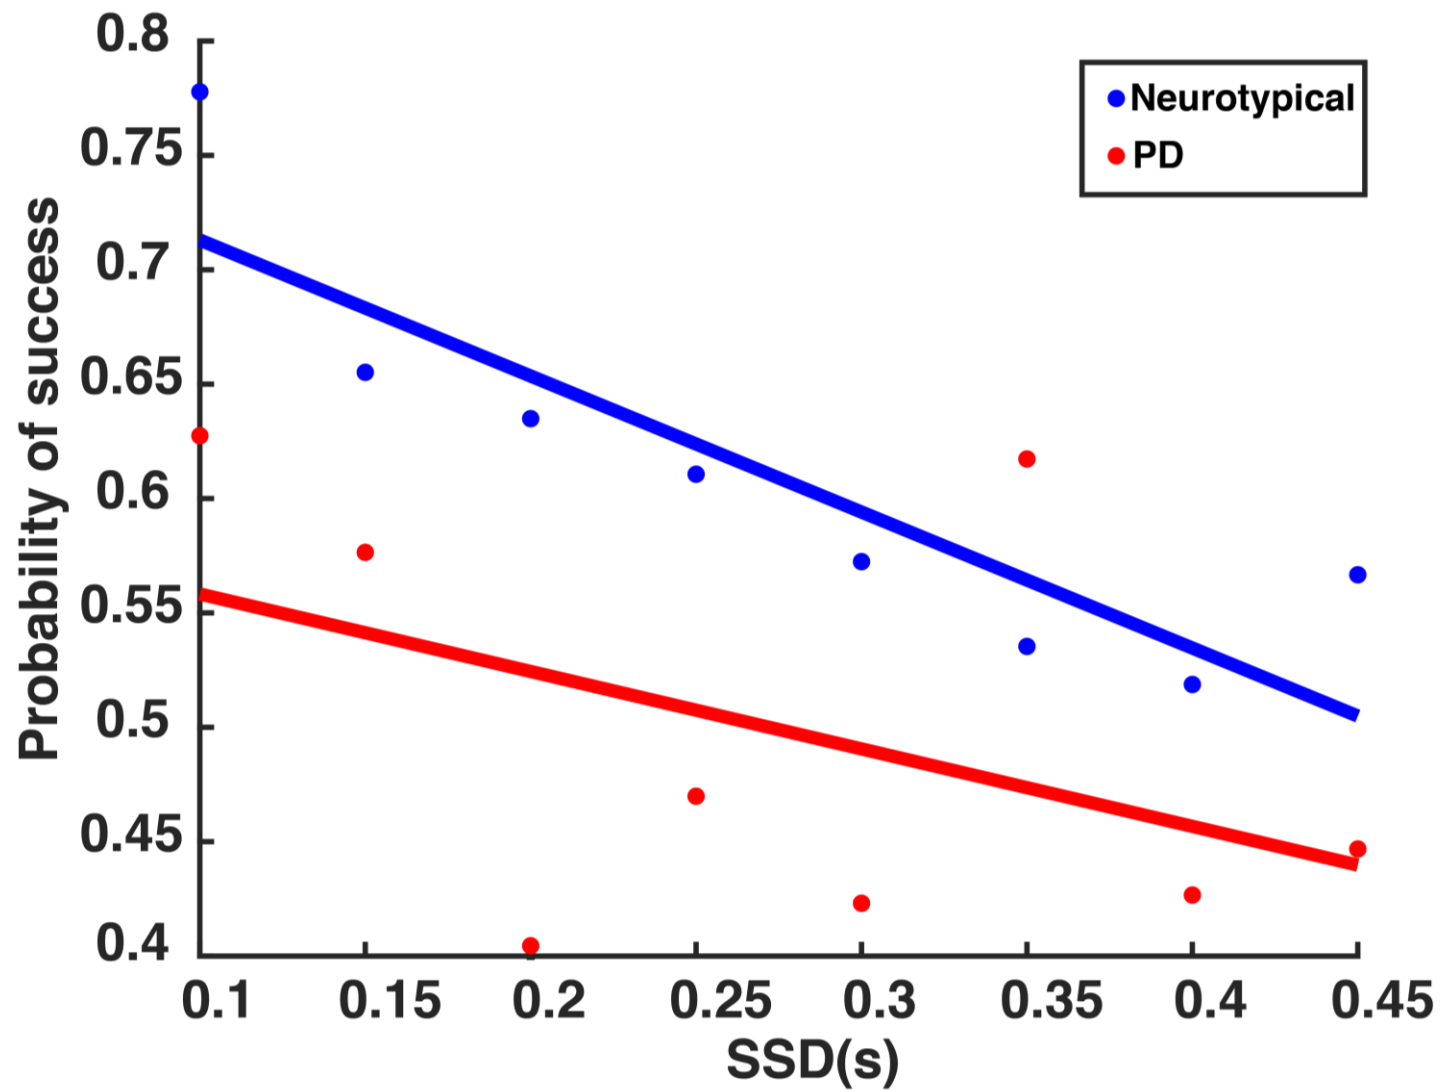

Figure 3

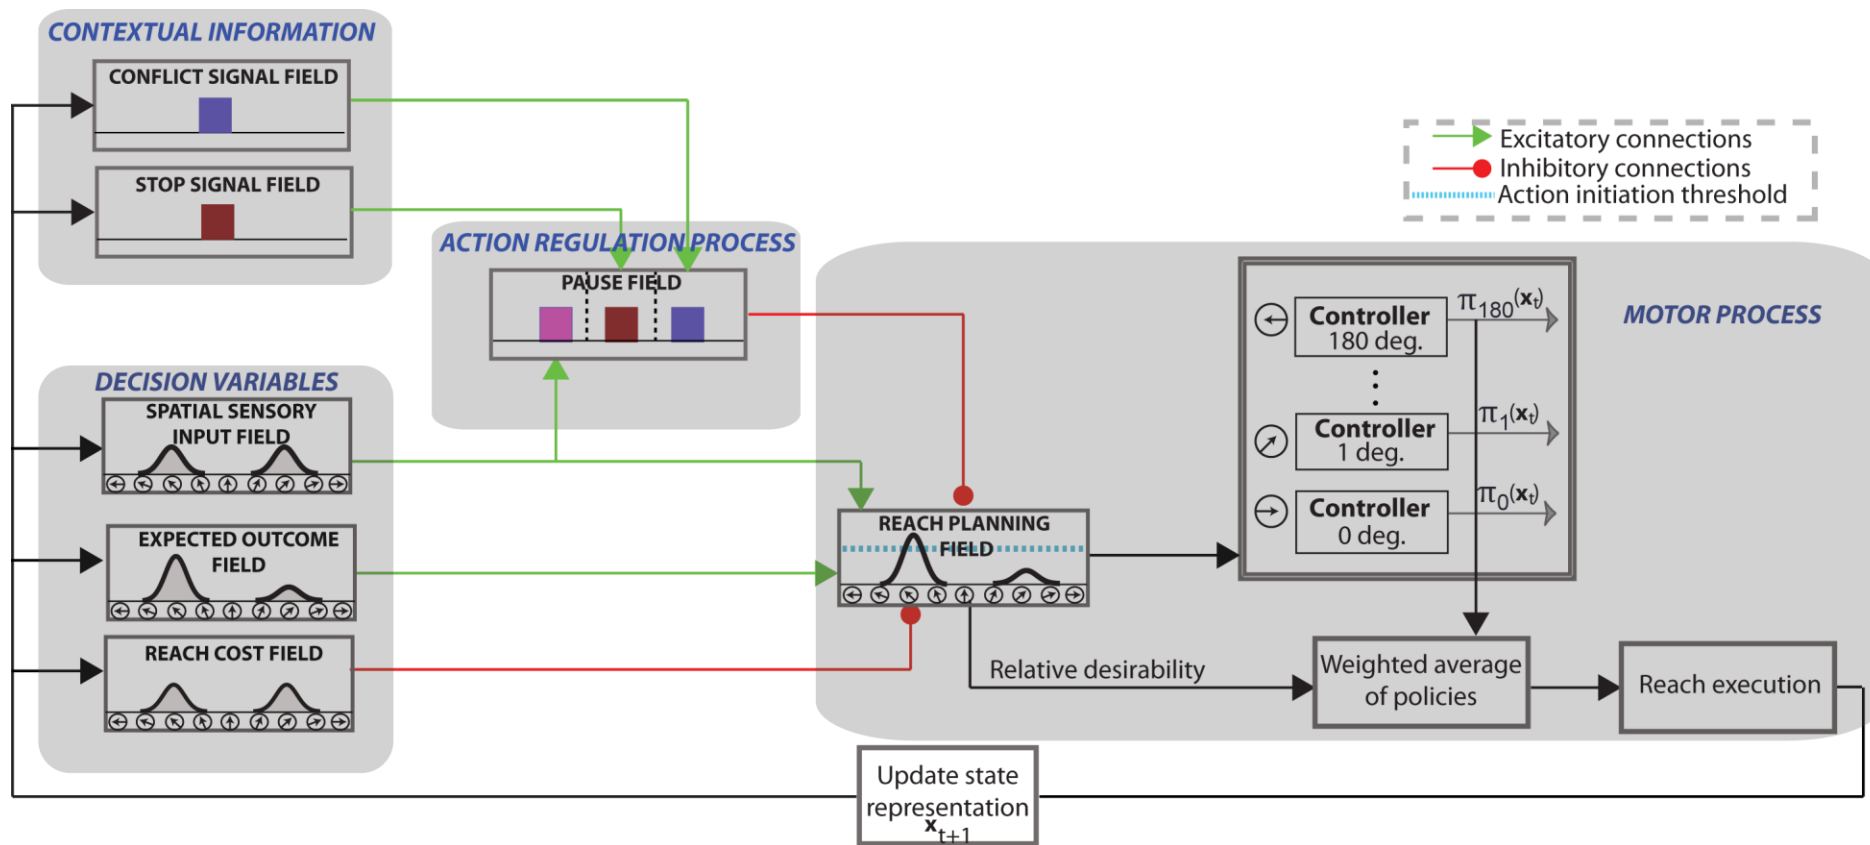

Figure 4

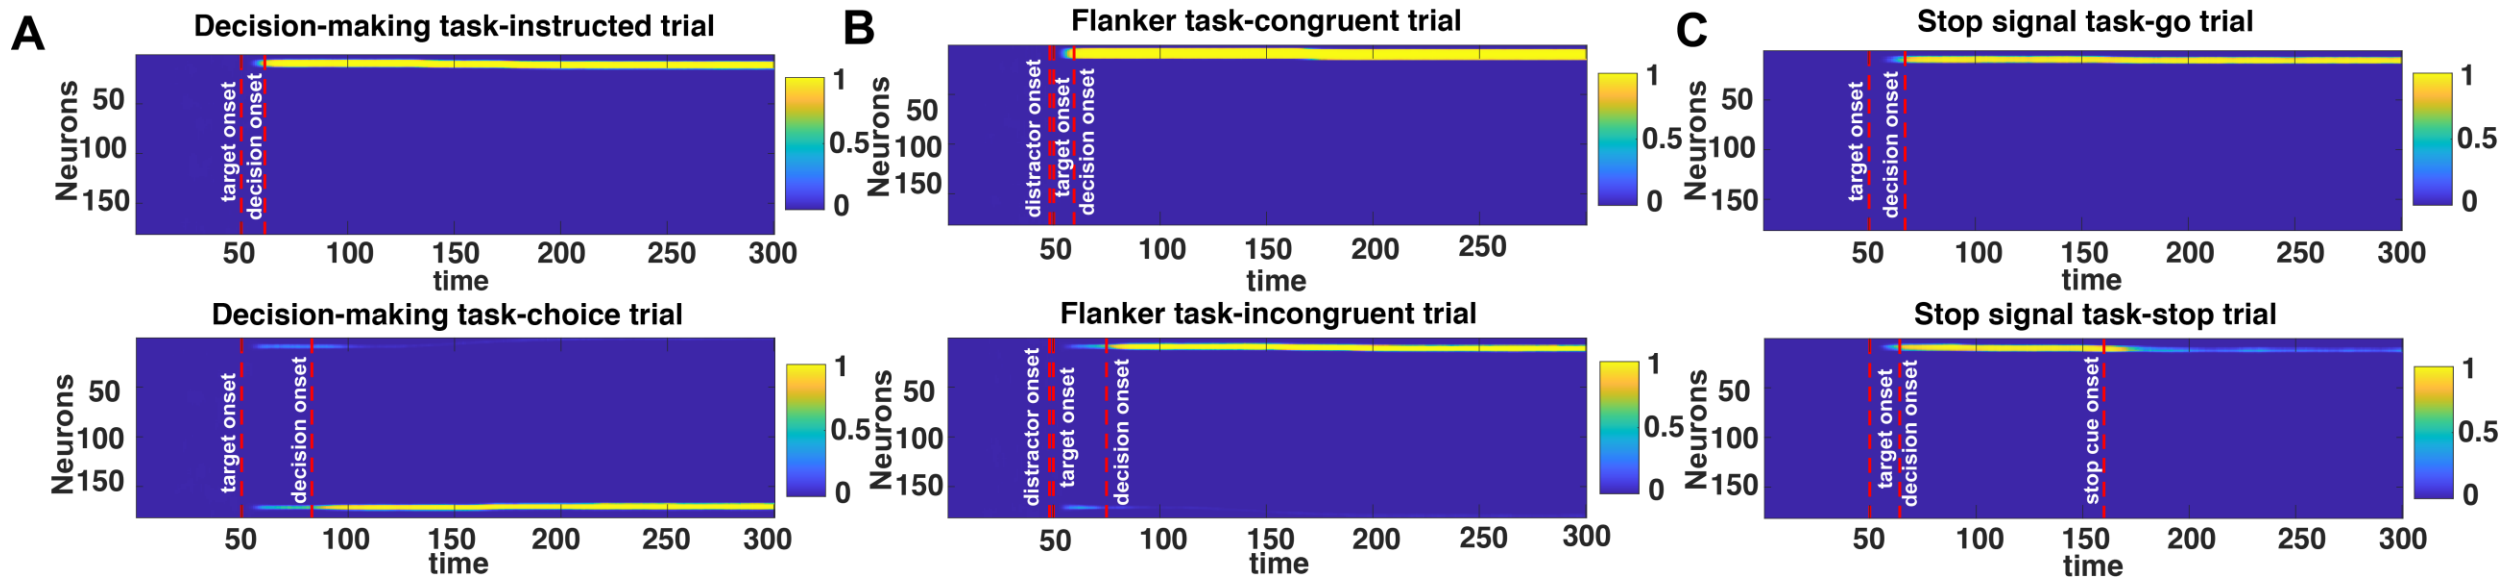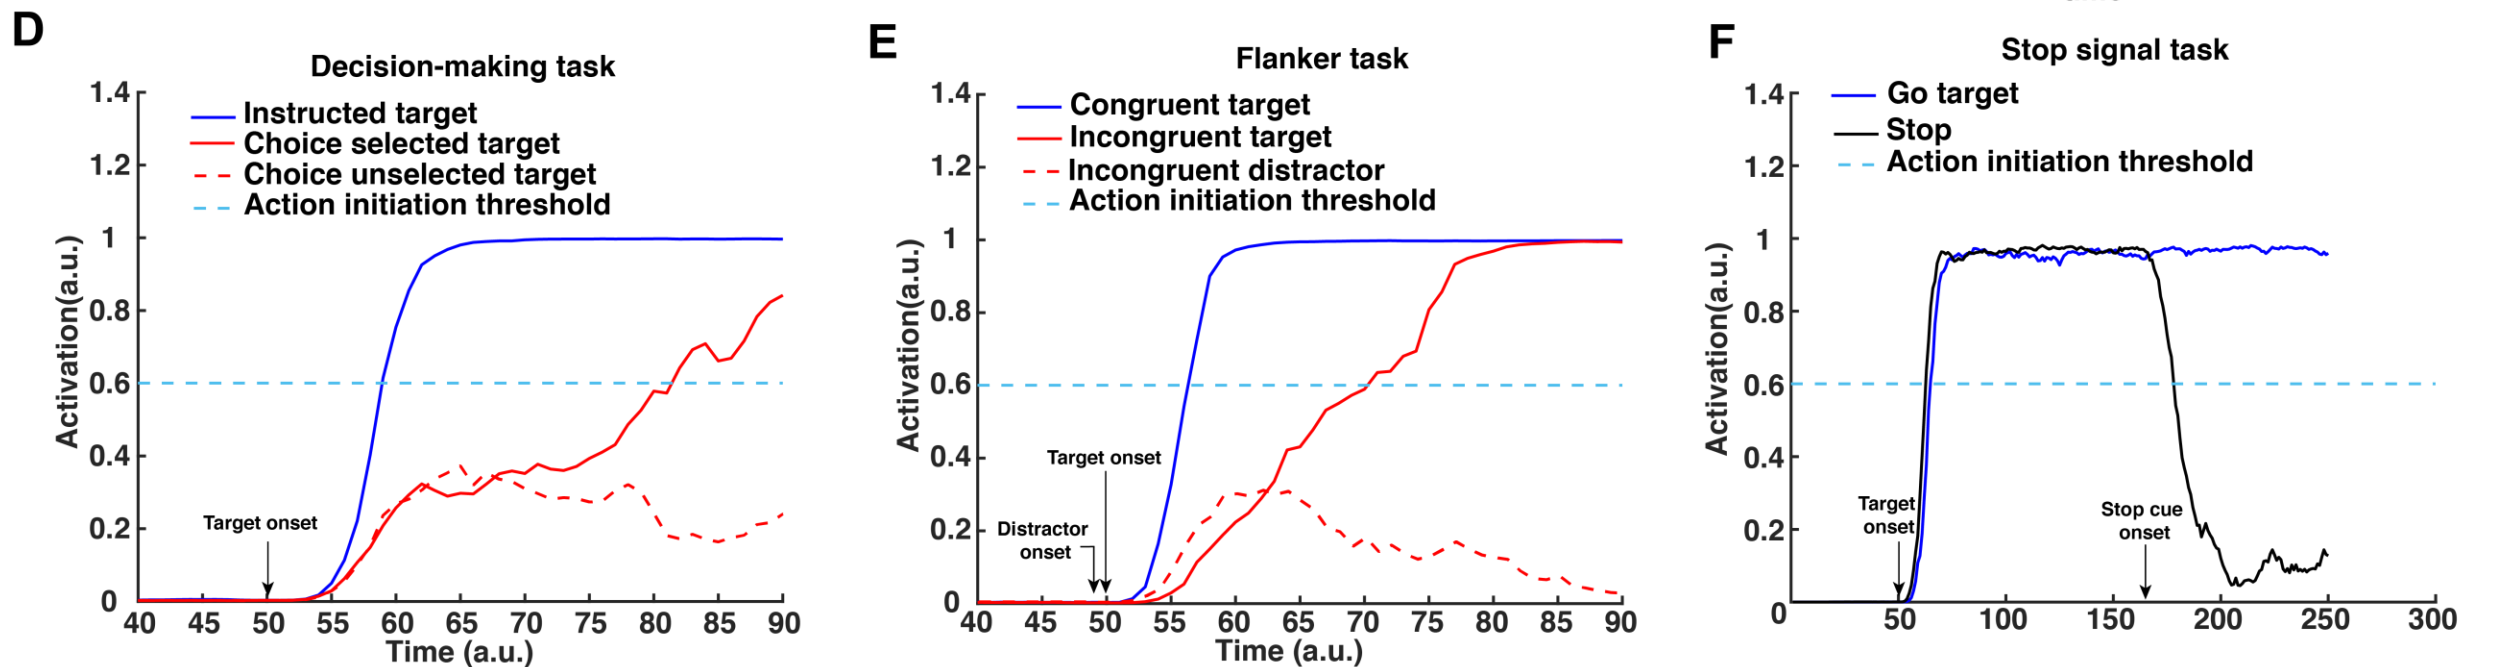

Figure 5

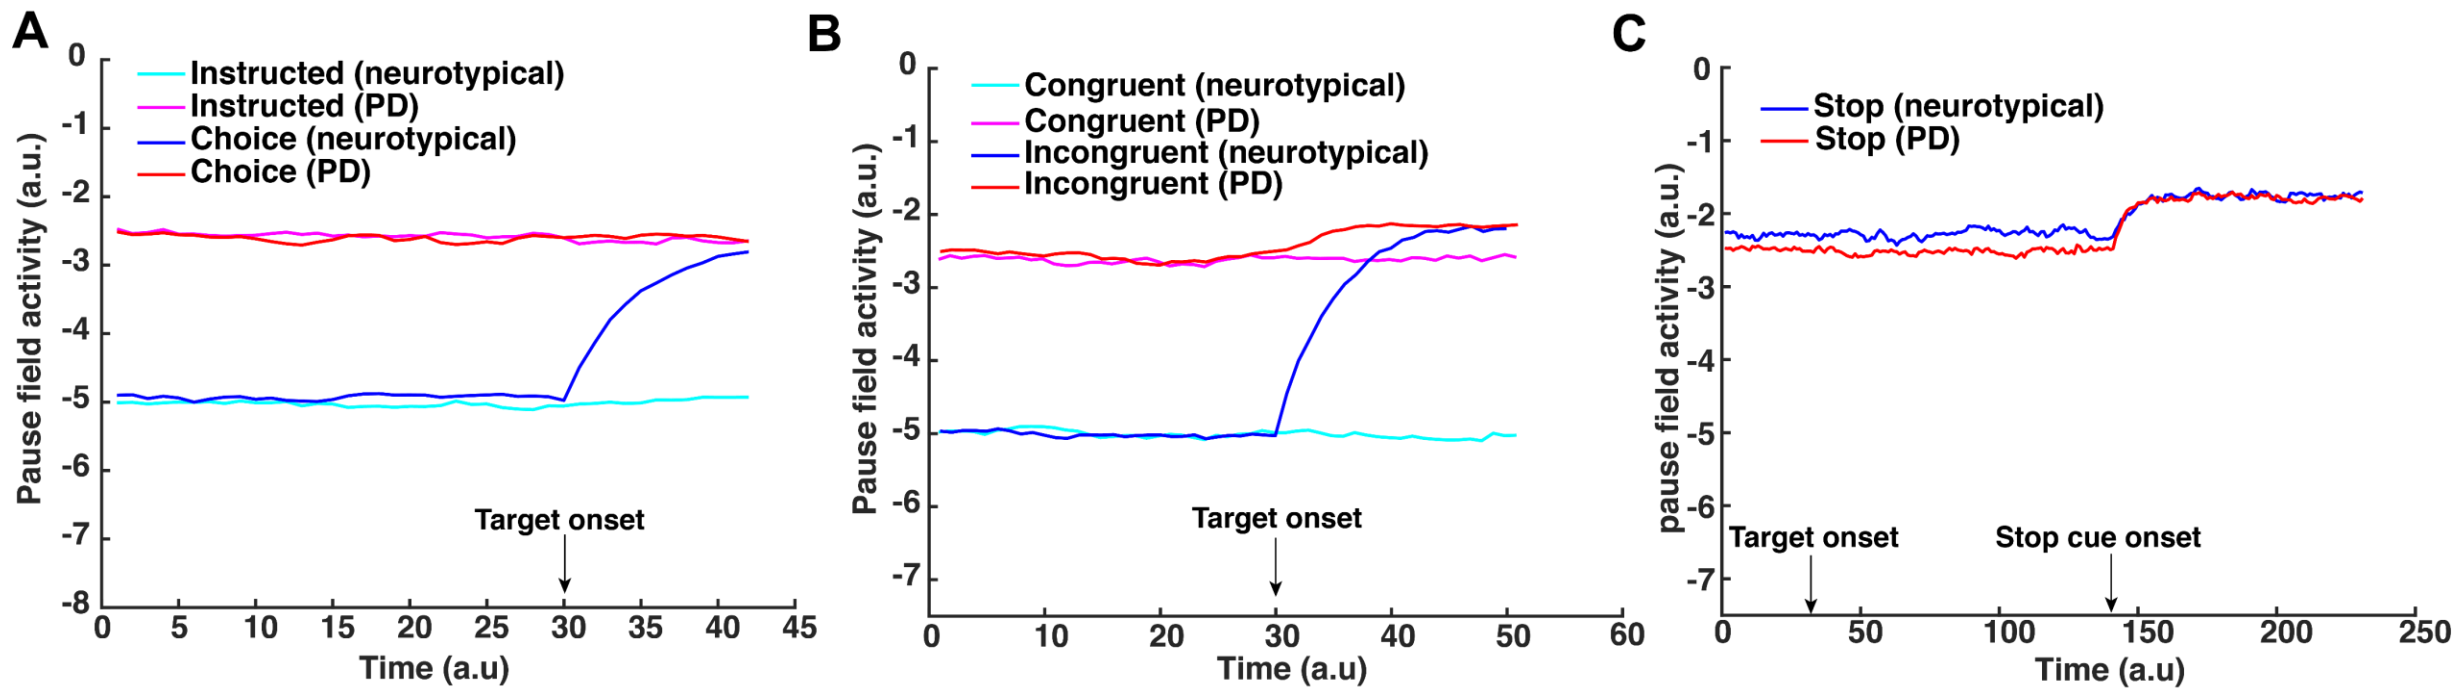

Figure 6

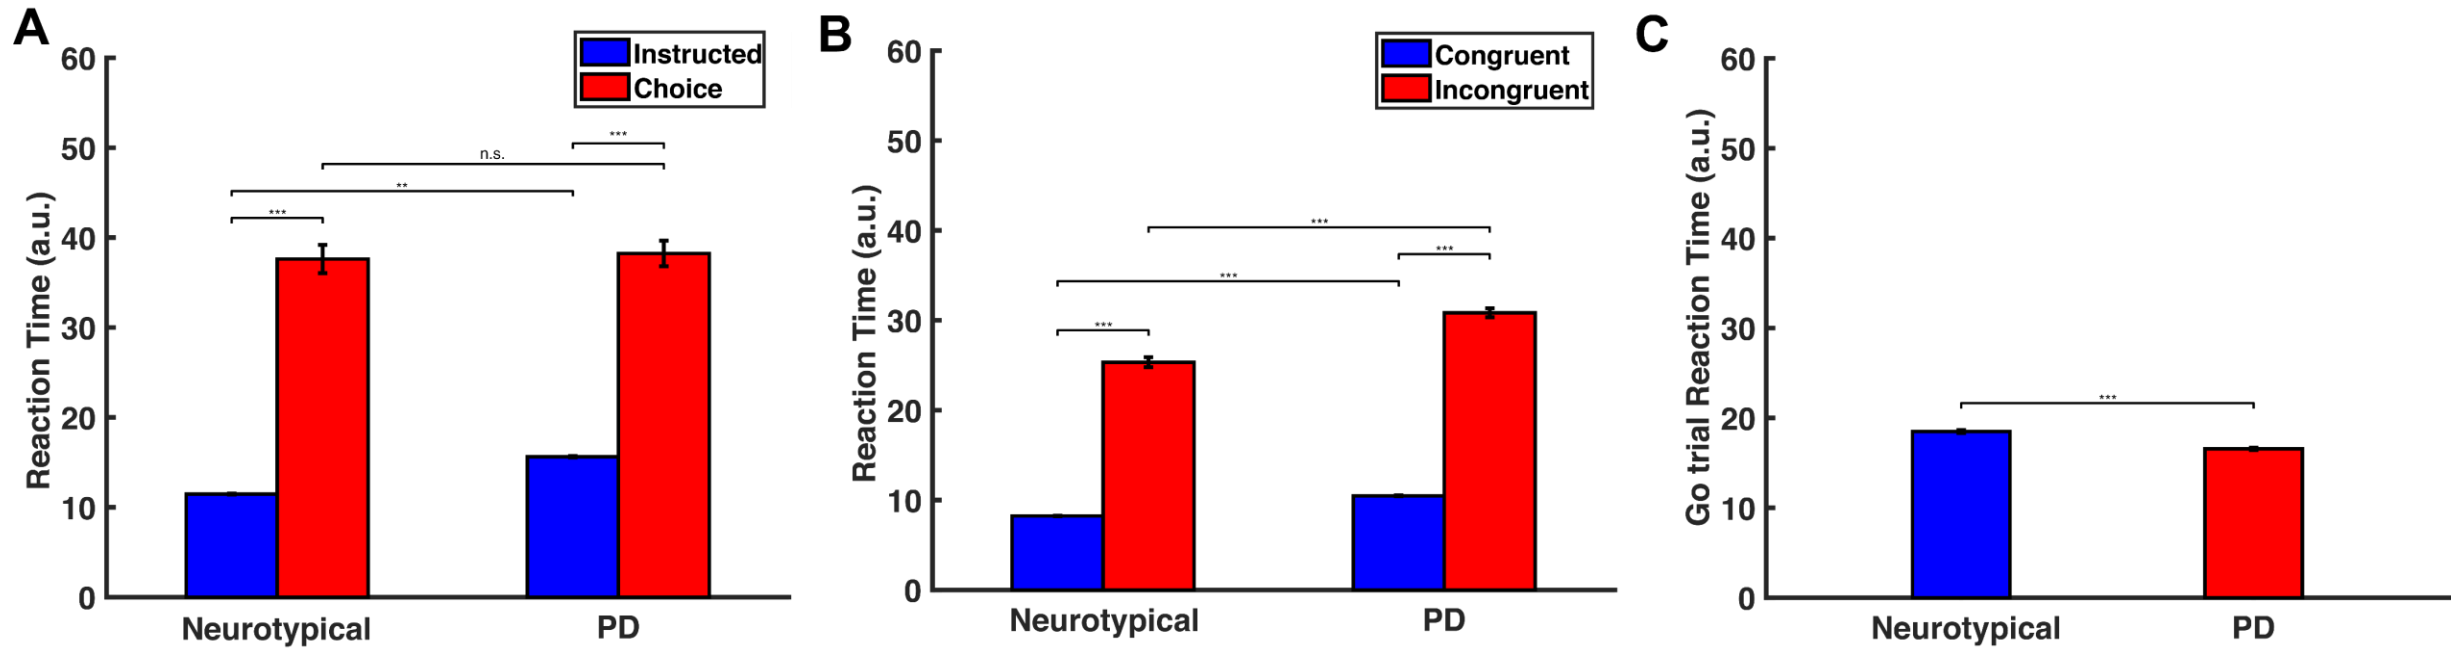

Figure 7



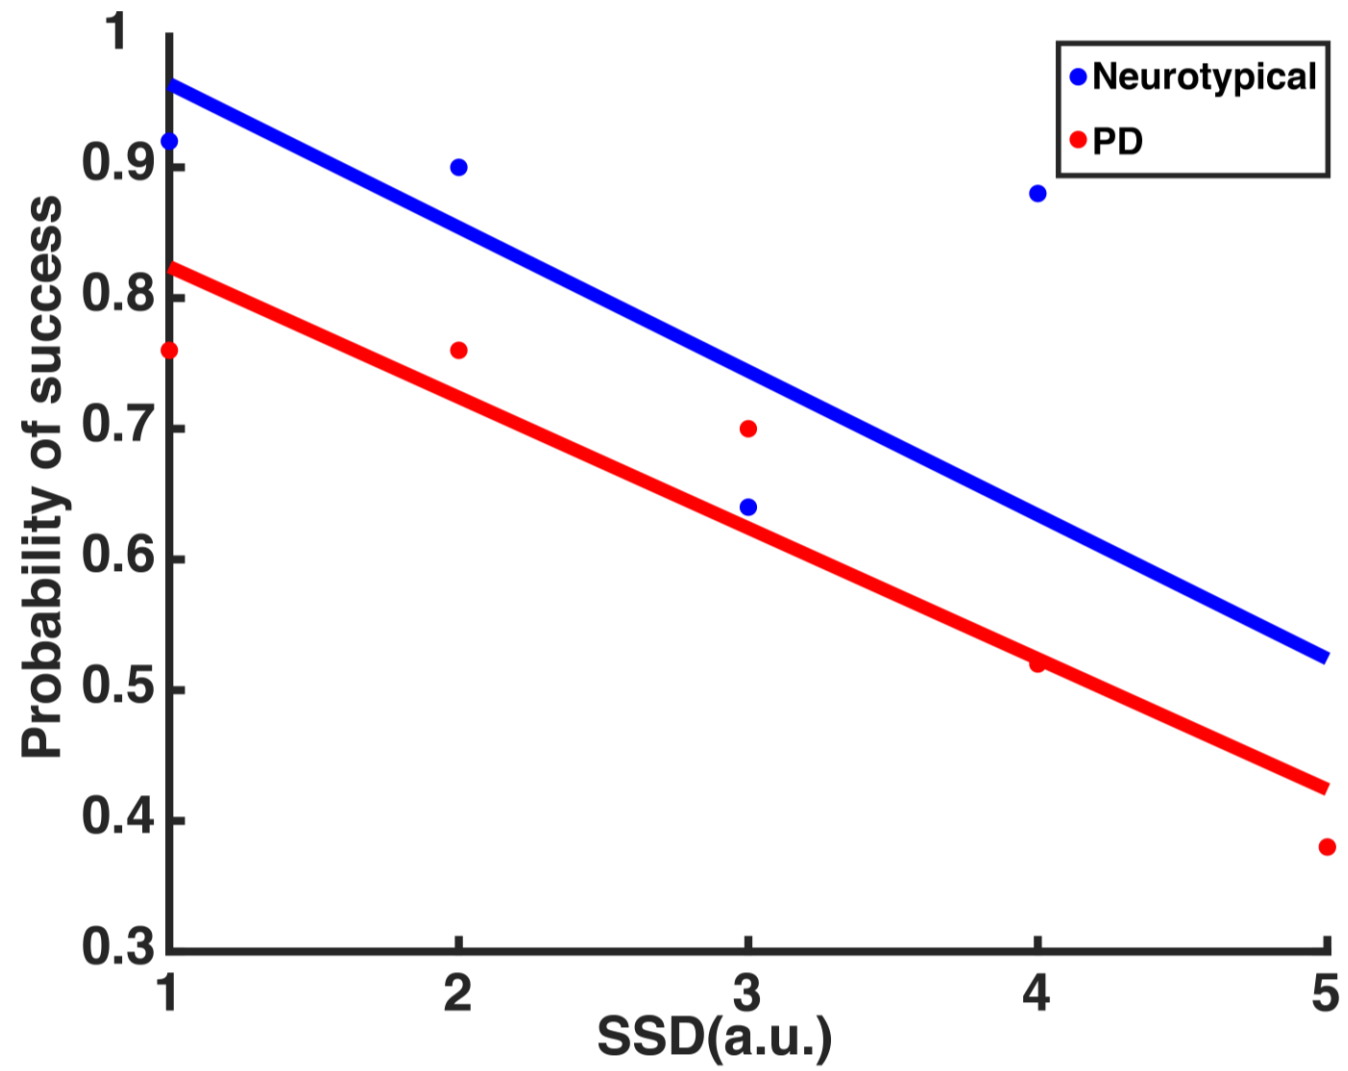

Figure 8

## S1 Table

| <b>Model Parameters</b> |                             |              |
|-------------------------|-----------------------------|--------------|
| <b>Parameters</b>       | <b>Description</b>          | <b>Value</b> |
| $\eta_{loc}$            | Visual input gain           | 8.5          |
| $\eta_{reward}$         | Expected outcome input gain | 2.5          |
| $\eta_{cost}$           | Action cost input gain      | -0.1         |
| $\eta_{pau}$            | Pause input gain            | -4.0         |
| $\gamma$                | Action initiation threshold | 0.6          |

| <b>Spatial sensory input field &amp; Expected outcome field parameters</b> |                                                  |              |
|----------------------------------------------------------------------------|--------------------------------------------------|--------------|
| <b>Parameters</b>                                                          | <b>Description</b>                               | <b>Value</b> |
| $\tau$                                                                     | Time constant                                    | 5.0          |
| $c_{exc}$                                                                  | Amplitude of excitatory portion of weight kernel | 0            |
| $c_{inh}$                                                                  | Amplitude of inhibitory portion of weight kernel | 0            |
| $\sigma_{exc}$                                                             | Width of excitatory portion of weight kernel     | 5.0          |
| $\sigma_{inh}$                                                             | Width of inhibitory portion of weight kernel     | 40.0         |
| $h$                                                                        | Resting activity level                           | -5.0         |
| $q$                                                                        | Noise level                                      | 0.25         |
| $\sigma_q$                                                                 | Width of noise kernel                            | 5.0          |
| $\beta$                                                                    | Steepness of sigmoid activity function           | 1.0          |

| <b>Reach planning field parameters</b> |                                                  |              |
|----------------------------------------|--------------------------------------------------|--------------|
| <b>Parameters</b>                      | <b>Description</b>                               | <b>Value</b> |
| $\tau$                                 | Time constant                                    | 5.0          |
| $c_{exc}$                              | Amplitude of excitatory portion of weight kernel | 0            |
| $c_{inh}$                              | Amplitude of inhibitory portion of weight kernel | 20           |
| $\sigma_{exc}$                         | Width of excitatory portion of weight kernel     | 5.0          |
| $\sigma_{inh}$                         | Width of inhibitory portion of weight kernel     | 180          |
| $h$                                    | Resting activity level                           | -5.0         |
| $q$                                    | Noise level                                      | 0.5          |
| $\sigma_q$                             | Width of noise kernel                            | 5.0          |
| $\beta$                                | Steepness of sigmoid activity function           | 1.0          |

| <b>Pause field parameters</b> |                                                  |              |
|-------------------------------|--------------------------------------------------|--------------|
| <b>Parameters</b>             | <b>Description</b>                               | <b>Value</b> |
| $\tau$                        | Time constant                                    | 5.0          |
| $c_{exc}$                     | Amplitude of excitatory portion of weight kernel | 0            |
| $c_{inh}$                     | Amplitude of inhibitory portion of weight kernel | 0            |
| $\sigma_{exc}$                | Width of excitatory portion of weight kernel     | 5.0          |
| $\sigma_{inh}$                | Width of inhibitory portion of weight kernel     | 25.0         |
| $h$                           | Resting activity level                           | -5.0         |
| $q$                           | Noise level                                      | 0.25         |
| $\sigma_q$                    | Width of noise kernel                            | 5.0          |
| $\beta$                       | Steepness of sigmoid activity function           | 1.0          |
